# Supplementary material for: Electro-oxidative C(sp2)–H/O–H cross-dehydrogenative coupling of phenols and tertiary anilines for diaryl ether formation
Source: Royal Society of Chemistry journal article supplement (doi:10.1039/d1cy00186h), 2021-01-01
Supplement: d1cy00186h1.pdf [file d1cy00186h1.pdf]

## Supplementary Information

# Electro-Oxidative C(sp<sup>2</sup>)-H/O-H Cross-Dehydrogenative Coupling of Phenols and Tertiary Anilines for Diaryl Ether Formation

Hongyang Tang, Simon Smolders, Yun li, Dirk E. De Vos\* and Jannick Vercammen\*

*Centre for Membrane Separations, Adsorption, Catalysis, and Spectroscopy for Sustainable Solutions (cMACS), KU Leuven, Leuven, Belgium*

\*Correspondence to: dirk.devos@kuleuven.be (D.D.V.); Jannick.vercammen@kuleuven.be (J.V.).

# **Table of Contents**

- 1. General Information**
- 2. Cyclic Voltammetry**
- 3. Procedures for the Electrolysis**
- 4. Mechanism**
- 5. Characterization Data for Products**
- 6. NMR Spectra for New Compounds**
- 7. References**

## 1. General Information

**Gas chromatography (GC)** yields were determined using a Shimadzu GC-2014 equipped with a CP-SIL 8 CB column (Agilent, 60 m, 0.25  $\mu\text{m}$  film thickness, 0.32 mm ID). Samples of 1  $\mu\text{l}$  were injected automatically with an AOC-20s auto sampler and AOC-20i auto-injector aided by the GCsolution software bundle (version 2.44.00). Products were identified on an Agilent 6890 gas chromatograph equipped with a HP 1 MS column and coupled to a 5973 MSD mass spectrometer.

**Column chromatography** was performed on silica gel 60 A (0.060-0.200 mm, ACROS). The flash column chromatography was performed with silica gel (230-300 mesh). A mixture of petroleum ether and ethyl acetate in a ratio of 25/1, unless specified otherwise, was used as eluent mixture. Products were recrystallized using dichloromethane to assist in the removal of the eluent. Silica gel 60 sheets on Aluminum (F254, Merck, Darmstadt, Germany) were used for thin layer chromatography (TLC).

**$^1\text{H}$ ,  $^{13}\text{C}$  and  $^{19}\text{F}$  NMR** were recorded at room temperature, using a Bruker Avance 300 (300 MHz) equipped with a 5 mm BBO BB- $^1\text{H}$  probe, a Bruker Avance III HD 400 (400 MHz) equipped with a 5 mm PABBO BB/ $^{19}\text{F}$ - $^1\text{H}$ /D probe or a Bruker Avance II<sup>+</sup> HD 600 (600 MHz) equipped with a 5 mm PABBO BB (31P-109Ag)- $^1\text{H}$ /D probe. As solvent,  $\text{CDCl}_3$  was used in all cases.

**Cyclic voltammetry (CV)** curves were obtained on a Metrohm Autolab PGSTAT 302N electrochemical workstation and Nova 2.1 software. Solutions of **1a** (0.1 mmol) and/or **2a** (0.1 mmol) in HFIP/DCM = 6:4 (10 ml),  $^n\text{Bu}_4\text{NBF}_4$  (0.1 mmol) (see SI) and  $^n\text{Bu}_4\text{NBF}_4$  (1 mmol) as electrolyte were recorded at room temperature with a scan rate of 100 mV/s using a glassy carbon disk anode (diameter 1 mm), a platinum cathode (10 mm  $\times$  10 mm  $\times$  0.5 mm) and a Ferrocene reference electrode.

**Electron paramagnetic resonance (EPR)** spectra were recorded at room temperature on a Bruker 300E continuous wave spectrometer with a rectangular cavity and flat cell equipment. Data were analyzed and simulated using the EasySpin software package.<sup>1</sup> Solutions of **1a** (0.3 mmol) and/or **2a** (0.3 mmol) in 6 ml of HFIP/DCM (6:4) and  $^n\text{Bu}_4\text{NBF}_4$  (0.15 mmol) as electrolyte were electrolyzed for 1 hour using a constant current of 5 mA with a carbon felt anode (20 mm  $\times$  10 mm  $\times$  2 mm, SIGRACELL<sup>®</sup>GFA 6 EA, obtained from SGL Carbon, Germany) and a Pt cathode (10 mm  $\times$  10 mm  $\times$  0.5 mm). A custom reactor (see Figure S2B), devoid of copper wiring, was designed to avoid any interference from copper. After electrolysis, the sample was transferred to a capillary and measured within 20 minutes.

## 2. Supplementary cyclic voltammetry

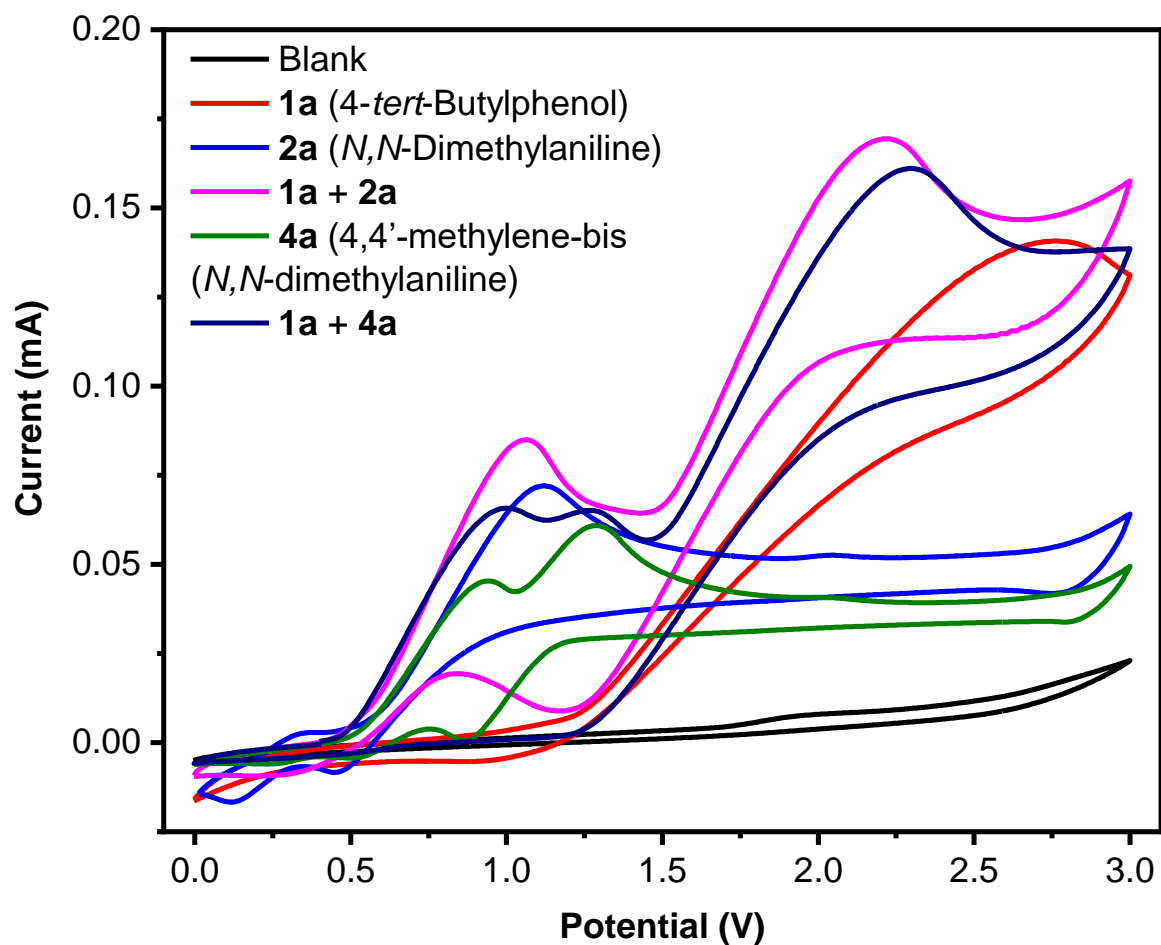

**Figure S1.** Additional cyclic voltammetry experiments at a lower concentration of supporting electrolyte  $n\text{Bu}_4\text{NBF}_4$  (0.1 mmol) on a glassy carbon anode (3 mm diameter), a platinum cathode and ferrocene reference electrode at  $0.1 \text{ V s}^{-1}$  under nitrogen. Experiments were conducted in a HFIP/DCM=6/4 solvent mixture.

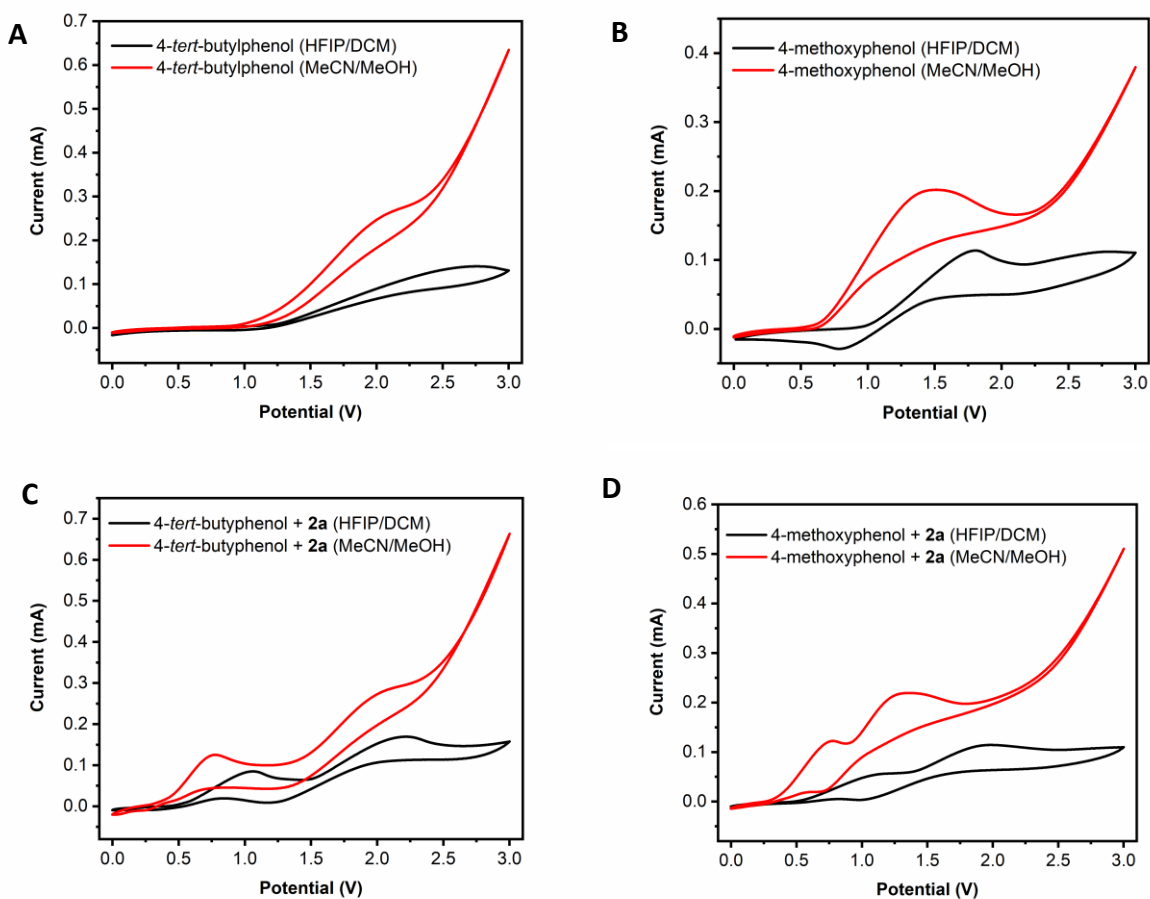

**Figure S2.** Additional cyclic voltammetry experiments on a glassy carbon anode (3 mm diameter), a platinum cathode and ferrocene reference electrode and  $n\text{Bu}_4\text{NBF}_4$  (0.1 mmol) as electrolyte at  $0.1 \text{ V s}^{-1}$  under nitrogen. Experiments were conducted both in a MeCN/MeOH solvent mixture (red lines) and a HFIP/DCM=6/4 solvent mixture (black lines). Following phenols were recorded; 4-*tert*-butylphenol (A,C), 4-methoxyphenol (B,D); both in the absence (A,B) and presence (C,D) of *N,N*-dimethylaniline.

### 3. Procedures for the diaryl ether formation

To a glass reactor (Figure S2A, made in campus glassworks, KULeuven), **1a** (0.3 mmol, 1 equiv), **2a** (0.3 mmol, 1 equiv),  $n\text{Bu}_4\text{NBF}_4$  (0.15 mmol, 0.5 equiv), HFIP (3.6 ml) and DCM (2.4 ml) were added. The reactor was equipped with a carbon felt as anode (20 mm  $\times$  10 mm  $\times$  2 mm, SIGRACELL®GFA 6 EA, obtained from SGL Carbon, Germany) and a nickel plate as cathode (20 mm  $\times$  10 mm  $\times$  1 mm, Goodfellow). The electrolysis was carried out at room temperature using a constant current of 5 mA until complete consumption of the substrate (monitored by TLC or GC). All reagents were obtained from commercial suppliers without further purification. A power supply of TENMA (72-10480) was used to control the current or potential.

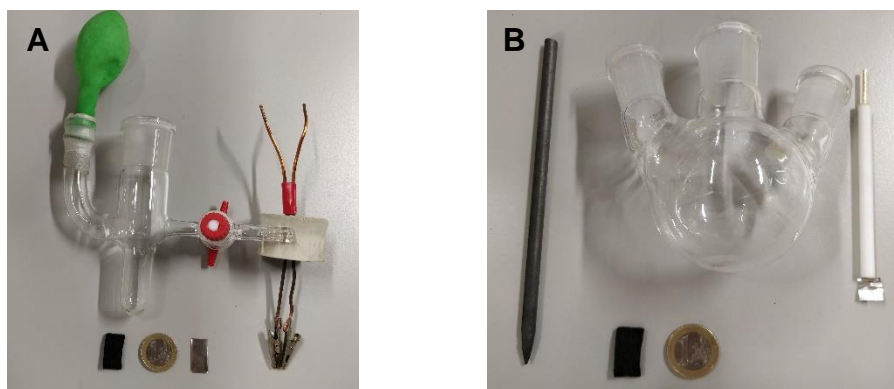

**Figure S3.** Glass reactors for the electrocatalytic formation of diarylethers (A) and for the electrolytic preparation for ePR measurements (B).

## 4. Mechanistic experiments

### 4.1 Reaction kinetics

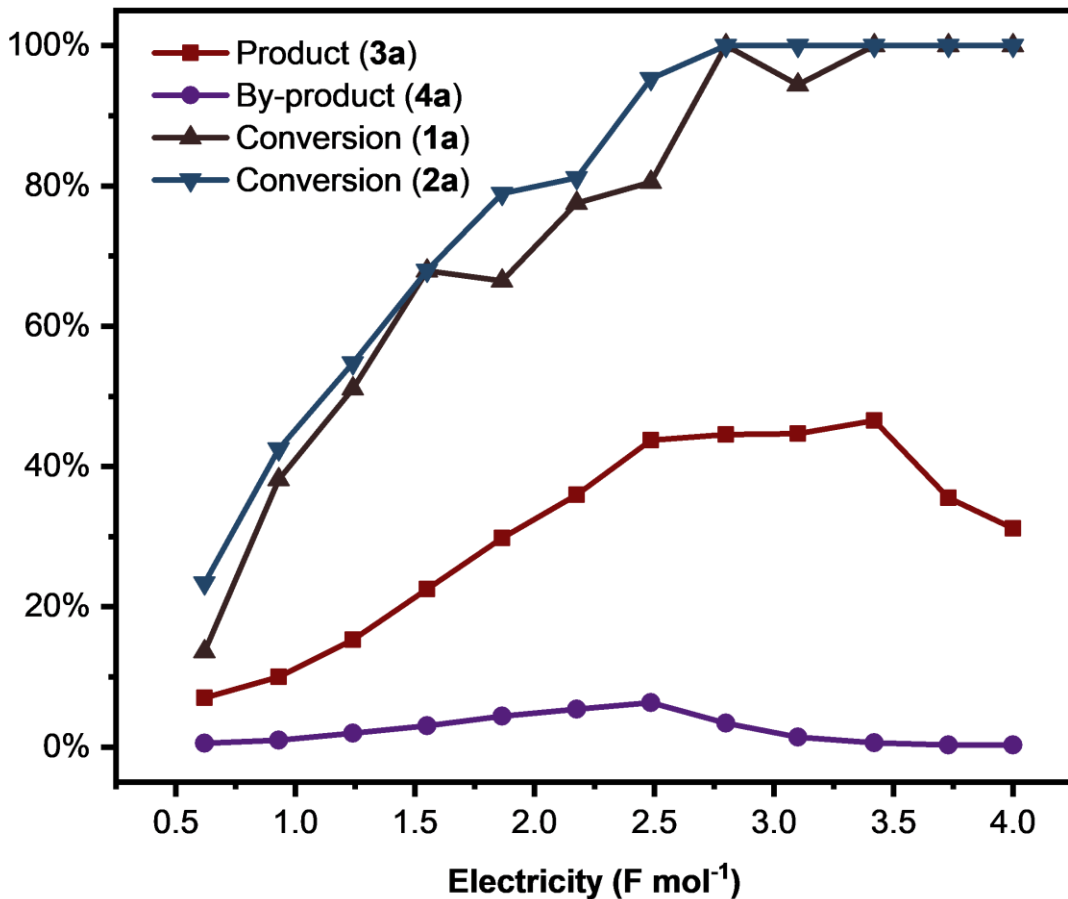

**Figure S4.** Reaction kinetics of electrocatalytic condensation of **1a** and **2a**. Reaction conditions: Carbon felt as anode and Nickel plate as cathode (10 mm x 10 mm x 1 mm), constant current at 5 mA, **1a** (0.3 mmol), **2a** (1 equiv, 0.3 mmol), <sup>t</sup>Bu<sub>4</sub>NBF<sub>4</sub> (0.5 equiv, 0.15 mmol), HFIP/DCM (6:4, 6 ml), room temperature, nitrogen; Yield determined by GC analysis using octane as the external standard. HFIP = 1,1,1,3,3,3-hexafluoro-2-propanol, DCM = dichloromethane

## 4.2 Control experiments

### (1) Phenol experiments

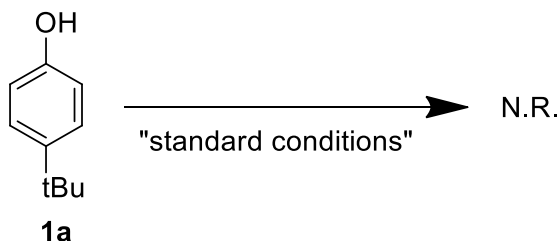

### (2) *N,N*-dimethylaniline experiments

#### ① *N,N*-dimethylaniline under our conditions with HFIP and DCM

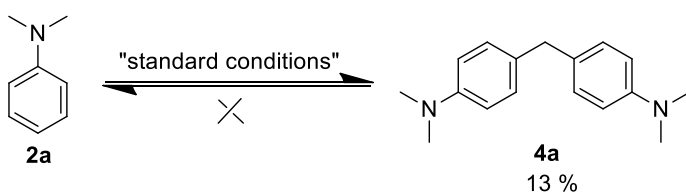

#### ② *N,N*-dimethylaniline under MeCN/AcOH

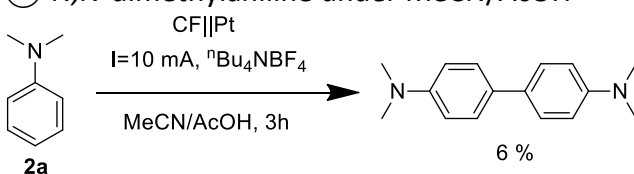

### (3) Phenol and 4,4'-methylene-bis(*N,N*-dimethylaniline), 4,4',4''-Methyldynetris(*N,N*-dimethylaniline) experiments

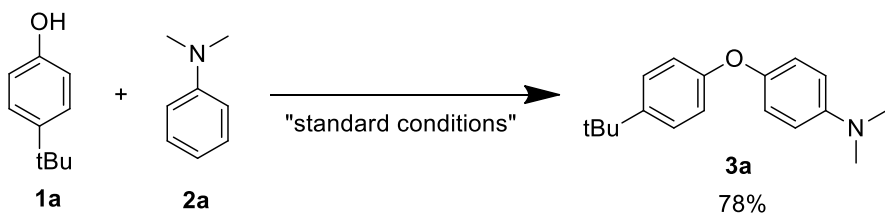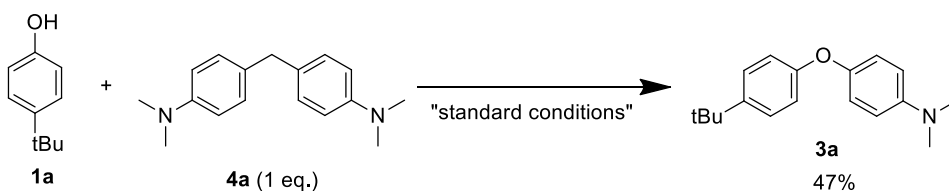



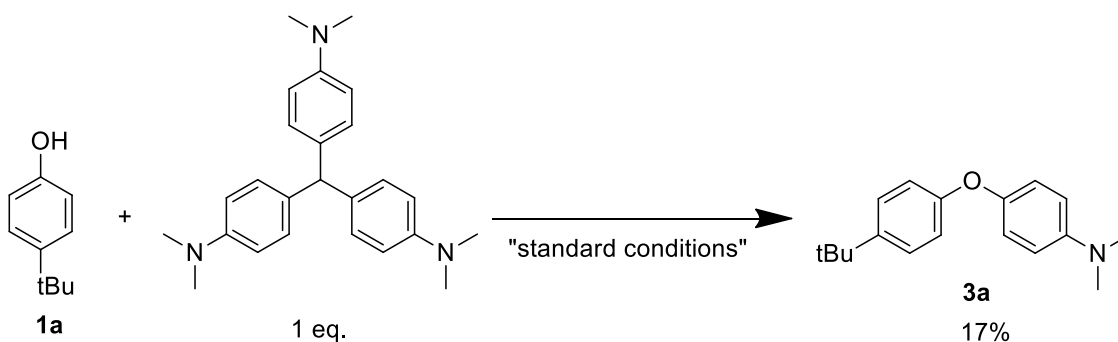

The substrate **1a** (0.3 mmol, 1 equiv), **2a** (0.3 mmol, 1 equiv), **4a** (0.3 mmol, 1 equiv) or 4,4',4''-Methyldynetris(*N,N*-dimethylaniline) (0.3 mmol),  $n\text{Bu}_4\text{NBF}_4$  (0.15 mmol, 0.5 equiv), HFIP (3.6 ml) and DCM (2.4 ml) were added respectively, then reacted under standard conditions. The yield of product **3a** was 78%, 47% and 17% respectively. In addition, the same solutions were stirred for two days without electricity, after which no conversion was observed. The color of the solution however changed depending on the employed aniline compound (Figure S4).

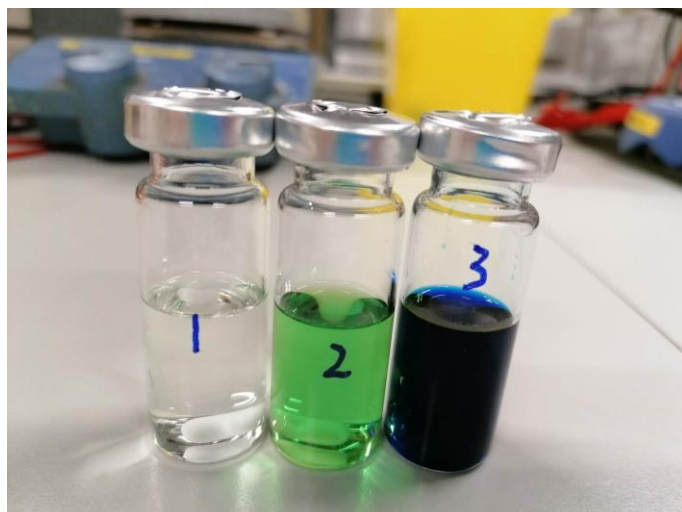

**Figure S5.** Solutions containing **2a** (1), **4a** (2) and 4,4',4''-Methyldynetris(*N,N*-dimethylaniline) (3) after two days of stirring at room temperature with **1a** (1 equiv),  $n\text{Bu}_4\text{NBF}_4$  (0.5 equiv), HFIP (3.6 ml) and DCM (2.4 ml).

(4) Phenol and *N,N*-dimethyl-*p*-toluidine

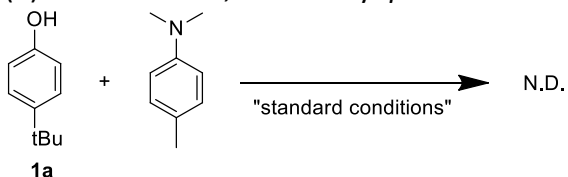

### 4.3 Radical trapping with butylated hydroxytoluene (BHT)

**Table S1.** Radical trapping experiment with BHT.<sup>a</sup>

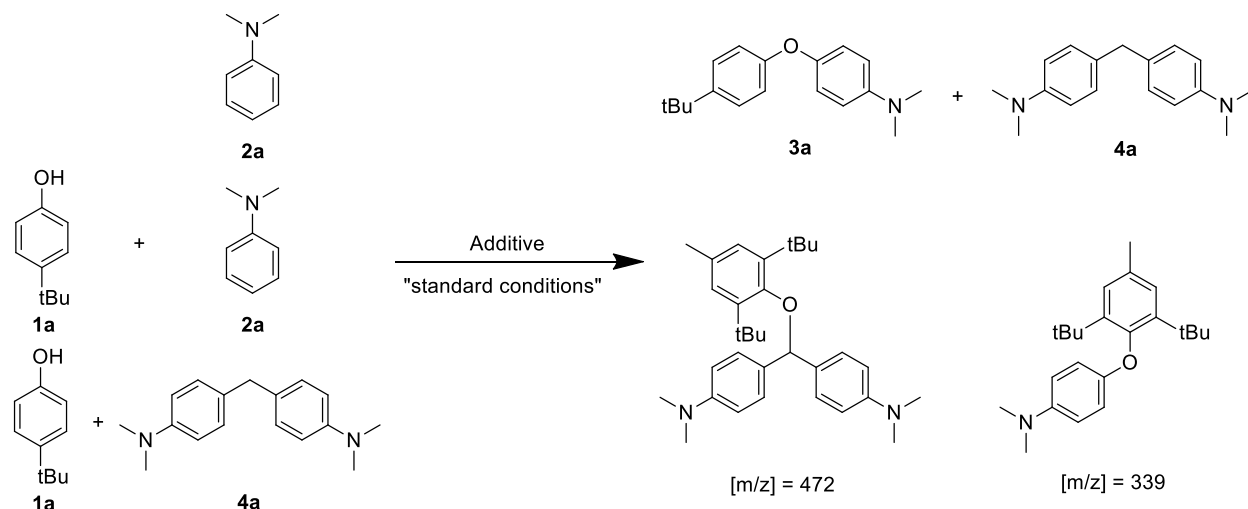

| Reactants | Yield |                 | GC-MS signal           |                        |
|-----------|-------|-----------------|------------------------|------------------------|
|           | 3a    | 4a <sup>c</sup> | [m/z]=472 <sup>d</sup> | [m/z]=339 <sup>e</sup> |
| 2a        | /     | - <sup>b</sup>  | Detected               | Detected               |
| 1a + 2a   | 12%   | - <sup>b</sup>  | N.D.                   | Detected               |
| 1a + 4a   | 36%   | 9%              | Detected               | N.D.                   |

<sup>a</sup>Reaction conditions: Carbon felt as anode and Nickel plate as cathode (10 mm x 10 mm x 1 mm), constant current of 5 mA, **1a** (0.3 mmol), **2a** or **4a** (1 equiv, 0.3 mmol), <sup>n</sup>Bu<sub>4</sub>NBF<sub>4</sub> (0.5 equiv, 0.15 mmol), BHT (1 equiv, 0.3 mmol), HFIP/DCM (6:4, 6 ml), room temperature, nitrogen, 5 h (3.1 F mol<sup>-1</sup>). <sup>b</sup> GC yields could not be determined due to an overlap in retention times between the product of BHT and **1a**. <sup>c</sup> GC-MS (EI, 70 eV): *m/z* (rel int., %): 127.0 (6), 134.0 (17), 165.0 (7), 210.1 (30), 211.1 (5), 237.1 (16), 238.1 (5), 253.1 (79), **254.1 (100)**, 255.1 (18). <sup>d</sup> GC-MS (EI, 70 eV): *m/z* (rel int., %): 73.0 (14), 133.0 (10), 134.1 (31), 147.0 (8), 190.9 (9), 207.0 (65), 208.0 (14), 253.2 (12), 281.0 (29), 282.0 (9), 341.0 (8), 415.2 (11), 457.3 (21), **472.3 (100)**, 473.3 (37), 474.4 (6). <sup>e</sup> GC-MS (EI, 70 eV): *m/z* (rel int., %): 57.1 (6), 226.1 (21), 227.1 (5), 267.1 (5), 268.1 (28), 283.2 (100), 284.2 (22), **339.2 (9)**.

## 4.4 Chemical oxidants

**Table S2.** Oxidative coupling of **1a** and **2a** with oxidants.<sup>a</sup>

| Entry          | Oxidant                                                   | <b>3a</b> | <b>4a</b> |
|----------------|-----------------------------------------------------------|-----------|-----------|
| 1              | None                                                      | <1%       | 1%        |
| 2              | 4 bar O <sub>2</sub>                                      | <1%       | 2%        |
| 3              | 8 bar O <sub>2</sub>                                      | <1%       | 2%        |
| 4              | TBHP (70% in H <sub>2</sub> O)                            | 3%        | 12%       |
| 5              | TBHP (70% in H <sub>2</sub> O) <sup>c</sup>               | 1%        | 11%       |
| 6              | TBEC                                                      | 2%        | 12%       |
| 7              | H <sub>2</sub> O <sub>2</sub> (30% in water)              | 3%        | 24%       |
| 8              | H <sub>2</sub> O <sub>2</sub> (30% in water) <sup>c</sup> | <1%       | 5%        |
| 9 <sup>b</sup> | H <sub>2</sub> O <sub>2</sub> (30% in water)              | <1%       | <1%       |

<sup>a</sup>Reaction conditions: 0.1 mmol 4-*tert*-butylphenol, 0.1 mmol *N,N*-dimethylaniline, 0.11 mmol oxidant (1.1 equiv), 1.2 ml HFIP and 0.8 ml DCM, 80°C, 3 h, under N<sub>2</sub> unless stated otherwise.

<sup>b</sup>40°C, 16 h. <sup>c</sup>10 μmol of TBAI was added.

## 4.5 Comparison with previous work

**Table S3.** Summary of previous work

| Entry           | Year | Reaction | Electrode | Reaction Conditions                                                                  | By-product             | Ref. |
|-----------------|------|----------|-----------|--------------------------------------------------------------------------------------|------------------------|------|
| 1               | 2018 |          | Pt    Pt  | I=3 mA, 6 h,<br>MeCN/AcOH,<br><sup>n</sup> Bu <sub>4</sub> NBF <sub>4</sub>          | No by-product reported | 2    |
| 2               | 2019 |          | C    Pt   | I=10 mA, 3 h,<br>MeCN/AcOH,<br><sup>n</sup> Bu <sub>4</sub> NBF <sub>4</sub> , 60 °C | No by-product reported | 3    |
| 3               | 2019 |          | C    Pt   | I=7 mA, 2 h,<br>MeCN/MeOH,<br><sup>n</sup> Bu <sub>4</sub> NBF <sub>4</sub>          |                        | 4    |
| 4               | 2020 |          | C    Pt   | I=5 mA, 4h, HFIP,<br><sup>n</sup> Bu <sub>4</sub> NPF <sub>6</sub>                   |                        | 5    |
| <b>Our work</b> |      |          | CF    Ni  | I=5 mA, 6 h,<br><sup>n</sup> Bu <sub>4</sub> NBF <sub>4</sub> ,<br>HFIP/DCM          |                        |      |

## 4.6 Reported mechanisms of possible side-reactions

### 4.6.1 Electrochemical *N,N*-dimethylaniline formation<sup>6</sup>

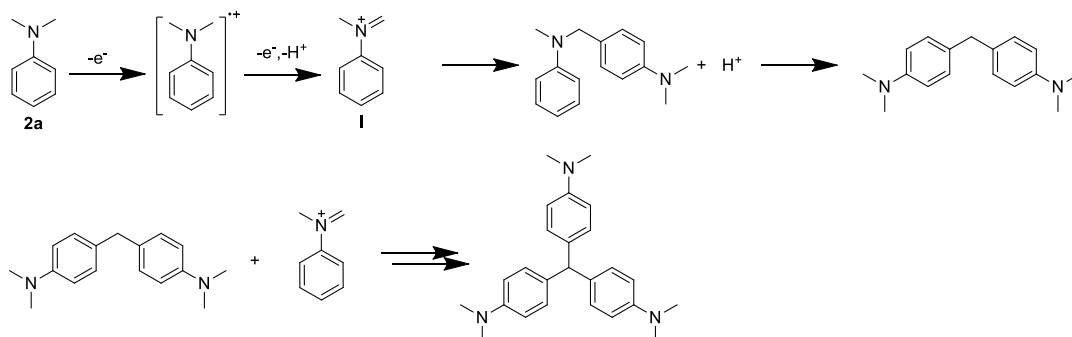

#### 4.6.1.1 Nucleophilic attack of phenol on *cation of 4a*<sup>7,8</sup>

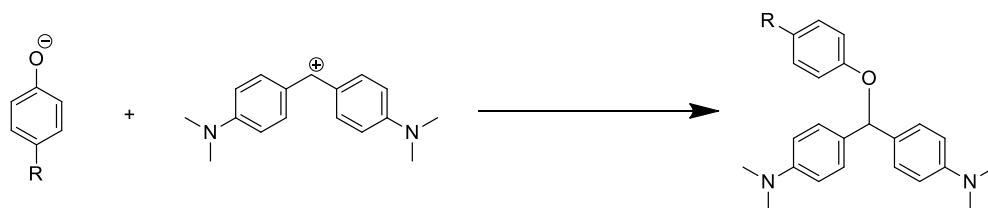

## 5. Characterization Data of Products

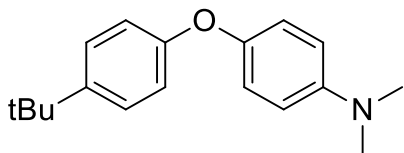

**4-(4-(*tert*-butyl)phenoxy)-*N,N*-dimethylaniline (3aa):** The desired pure product was obtained in 70% yield as a brown oil, 56.5 mg.  $^1\text{H}$  NMR (400 MHz,  $\text{CDCl}_3$ )  $\delta$  = 7.32 – 7.27 (m, 2H), 6.99 – 6.93 (m, 2H), 6.89 – 6.84 (m, 2H), 6.77 – 6.71 (m, 2H), 2.93 (s, 6H), 1.31 (s, 9H);  $^{13}\text{C}$  NMR (101 MHz,  $\text{CDCl}_3$ )  $\delta$  = 158.89, 153.38, 147.68, 129.09, 120.83, 119.27, 115.17, 114.21, 41.45, 34.94, 31.48.

GC-MS (EI, 70 eV):  $m/z$  (rel int., %): 112.6 (10), 136.0 (14), 254.1 (63), 255.1 (11), 268.1 (6), 269.1 (100), 270.1 (20).

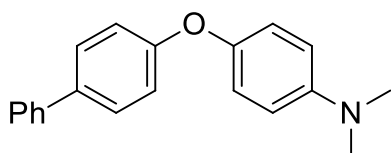

**4-([1,1'-biphenyl]-4-yloxy)-*N,N*-dimethylaniline (3ab):** The desired pure product was obtained in 59% yield as a white solid, 50.8 mg.  $^1\text{H}$  NMR (400 MHz,  $\text{CDCl}_3$ )  $\delta$  = 7.59 – 7.55 (m, 2H), 7.55 – 7.50 (m, 2H), 7.43 (t,  $J=7.7$  Hz, 2H), 7.33 (t,  $J=7.3$  Hz, 1H), 7.04 (t,  $J=2.4$  Hz, 2H), 7.02 (t,  $J=2.3$  Hz, 2H), 6.80 – 6.76 (m, 2H), 2.96 (s, 6H);  $^{13}\text{C}$  NMR (75 MHz,  $\text{CDCl}_3$ )  $\delta$  = 158.91, 147.91, 147.36, 140.91, 135.19, 128.90, 128.38, 127.00, 121.19, 114.13, 41.37.

GC-MS (EI, 70 eV):  $m/z$  (rel int., %): 136.0 (22), 152.0 (10), 274.1 (6), 288.1 (29), 289.1 (100), 290.1 (23).

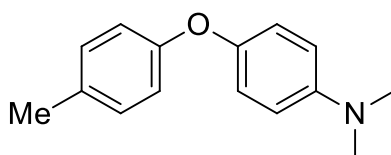

***N,N*-dimethyl-4-(*p*-tolylloxy)aniline (3ac):** The desired pure product was obtained in 38% yield as a yellow oil, 26.2 mg.  $^1\text{H}$  NMR (400 MHz,  $\text{CDCl}_3$ )  $\delta$  = 7.08 (d,  $J=8.2$  Hz, 2H), 6.98 – 6.91 (m, 2H), 6.87 – 6.79 (m, 2H), 6.79 – 6.68 (m, 2H), 2.93 (s, 6H), 2.30 (s, 3H);  $^{13}\text{C}$  NMR (101 MHz,  $\text{CDCl}_3$ )  $\delta$  = 156.86, 131.65, 130.16, 120.68, 117.52, 41.49, 20.77.

GC-MS (EI, 70 eV):  $m/z$  (rel int., %): 136.0 (23), 212.0 (9), 226.1 (47), 227.1 (100), 228.1 (16).

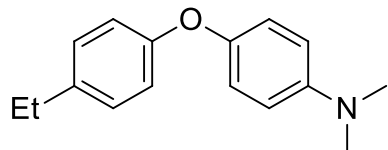

**4-(4-ethylphenoxy)-*N,N*-dimethylaniline (3ad):** The desired pure product was obtained in 40% yield as a brown oil, 29.2 mg.  $^1\text{H NMR}$  (400 MHz,  $\text{CDCl}_3$ )  $\delta$  = 7.14 – 7.08 (m, 2H), 6.99 – 6.93 (m, 2H), 6.90 – 6.84 (m, 2H), 6.77 – 6.72 (m, 2H), 2.93 (s, 6H), 2.61 (q,  $J=7.6$  Hz, 2H), 1.23 (t,  $J=7.6$  Hz, 3H);  $^{13}\text{C NMR}$  (75 MHz,  $\text{CDCl}_3$ )  $\delta$  = 157.03, 148.08, 147.59, 138.08, 128.94, 120.76, 117.43, 114.21, 28.25, 15.99.

GC-MS (EI, 70 eV):  $m/z$  (rel int., %): 136.0 (19), 226.0 (13), 240.1 (35), 241.1 (100), 242.1 (17).

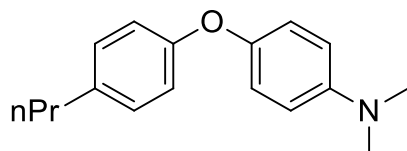

***N,N*-dimethyl-4-(4-propylphenoxy)aniline (3ae):** The desired pure product was obtained in 32% yield as a brown oil, 24.3 mg.  $^1\text{H NMR}$  (400 MHz,  $\text{CDCl}_3$ )  $\delta$  = 7.11 – 7.07 (m, 2H), 6.97 – 6.94 (m, 2H), 6.88 – 6.84 (m, 2H), 6.75 (d,  $J=9.0$  Hz, 2H), 2.93 (s, 6H), 2.56 – 2.51 (m, 2H), 1.65 – 1.59 (m, 2H), 0.94 (t,  $J=7.4$  Hz, 3H);  $^{13}\text{C NMR}$  (75 MHz,  $\text{CDCl}_3$ )  $\delta$  = 136.59, 129.56, 120.75, 117.38, 114.39, 41.58, 37.43, 24.92, 13.99.

GC-MS (EI, 70 eV):  $m/z$  (rel int., %): 77.0 (5), 91.0 (5), 136.0 (15), 226.0 (30), 227.0 (5), 254.1 (19), 255.1 (100), 256.1 (19).

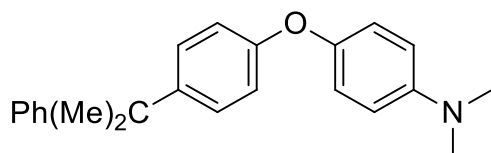

***N,N*-dimethyl-4-(4-(2-phenylpropan-2-yl)phenoxy)aniline (3af):** The desired pure product was obtained in 67% yield as a brown oil, 66.6 mg.  $^1\text{H NMR}$  (400 MHz,  $\text{CDCl}_3$ )  $\delta$  = 7.29 – 7.24 (m, 2H), 7.24 – 7.22 (m, 2H), 7.18 – 7.14 (m, 1H), 7.14 – 7.10 (m, 2H), 6.98 – 6.93 (m, 2H), 6.84 – 6.79 (m, 2H), 6.74 – 6.69 (m, 2H), 2.91 (s, 6H), 1.66 (s, 6H);  $^{13}\text{C NMR}$  (75 MHz,  $\text{CDCl}_3$ )  $\delta$  = 156.97, 150.94, 147.81, 147.61, 144.44, 128.15, 128.01, 126.91, 125.75, 120.99, 114.26, 77.62, 77.20, 76.78, 41.49, 31.06.

GC-MS (EI, 70 eV):  $m/z$  (rel int., %): 136.1 (16), 316.2 (55), 317.2 (14), 330.3 (4), 331.2 (100), 332.2 (26), 333.2 (4).

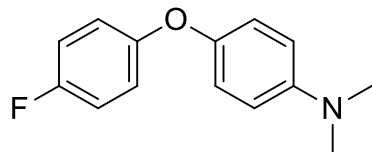

**4-(4-fluorophenoxy)-*N,N*-dimethylaniline (3ae):** The desired pure product was obtained in 52% yield as a brown solid, 36.1 mg.  $^1\text{H}$  NMR (400 MHz,  $\text{CDCl}_3$ )  $\delta$  = 7.01 – 6.95 (m, 2H), 6.95 – 6.91 (m, 2H), 6.91 – 6.86 (m, 2H), 6.77 – 6.71 (m, 2H), 2.93 (s, 6H);  $^{13}\text{C}$  NMR (101 MHz,  $\text{CDCl}_3$ )  $\delta$  = 155.06, 148.04, 147.79, 120.60, 118.78, 118.70, 116.22, 115.99, 114.17, 41.39;  $^{19}\text{F}$  NMR (376 MHz,  $\text{CDCl}_3$ )  $\delta$  = -122.17.

GC-MS (EI, 70 eV):  $m/z$  (rel int., %): 136.0 (33), 215.0 (11), 230.0 (58), 231.0 (100), 232.0 (16).

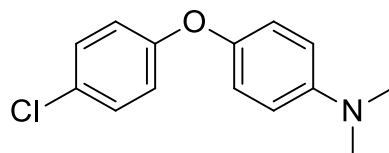

**4-(4-chlorophenoxy)-*N,N*-dimethylaniline (3ah):** The desired pure product was obtained in 58% yield as a yellow solid, 43.1 mg.  $^1\text{H}$  NMR (400 MHz,  $\text{CDCl}_3$ )  $\delta$  = 7.25 – 7.20 (m, 2H), 6.97 – 6.92 (m, 2H), 6.89 – 6.84 (m, 2H), 6.77 – 6.71 (m, 2H), 2.94 (s, 6H);  $^{13}\text{C}$  NMR (75 MHz,  $\text{CDCl}_3$ )  $\delta$  = 157.99, 147.08, 129.57, 126.95, 121.08, 118.48, 114.07, 41.31.

GC-MS (EI, 70 eV):  $m/z$  (rel int., %): 136.0 (39), 231.0 (8), 246.0 (53), 247.0 (100), 248.0 (33), 249.1 (35).

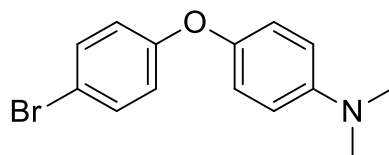

**4-(4-bromophenoxy)-*N,N*-dimethylaniline (3ai):** The desired pure product was obtained in 44% yield as a brown solid, 38.7 mg.  $^1\text{H}$  NMR (300 MHz,  $\text{CDCl}_3$ )  $\delta$  = 7.29 – 7.20 (d,  $J$ =8.9 Hz, 2H), 6.97 (d,  $J$ =9.1 Hz, 2H), 6.88 (d,  $J$ =8.9 Hz, 2H), 6.76 (d,  $J$ =9.0 Hz, 2H), 2.96 (s, 6H);  $^{13}\text{C}$  NMR (75 MHz,  $\text{CDCl}_3$ )  $\delta$  = 158.55, 148.03, 146.91, 132.51, 121.12, 118.92, 114.04, 41.29.

GC-MS (EI, 70 eV):  $m/z$  (rel int., %): 136.1 (51), 176.0 (8), 290.1 (45), 291.1 (100), 292.1 (58), 293.1 (99), 294.1 (15).



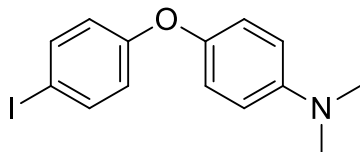

**4-(4-iodophenoxy)-*N,N*-dimethylaniline (3aj):** The desired pure product was obtained in 43% yield as a yellow solid, 44.2 mg.  $^1\text{H}$  NMR (400 MHz,  $\text{CDCl}_3$ )  $\delta$  = 7.60 – 7.52 (m, 2H), 6.98 – 6.91 (m, 2H), 6.76 – 6.71 (m, 2H), 6.71 – 6.67 (m, 2H), 2.94 (s, 6H);  $^{13}\text{C}$  NMR (101 MHz,  $\text{CDCl}_3$ )  $\delta$  = 159.44, 148.10, 146.73, 138.50, 121.20, 119.44, 114.04, 84.39, 41.29.

GC-MS (EI, 70 Ev):  $m/z$  (rel int., %): 76.0 (7), 136.0 (30), 212.0 (9), 337.9 (29), 338.9 (100), 292.1 (58), 339.9 (16).

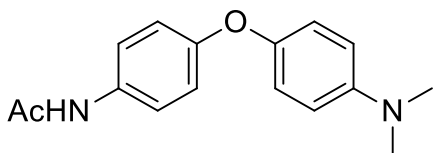

***N*-(4-(4-(dimethylamino)phenoxy)phenyl)acetamide (3ak):** The desired pure product was obtained in 64% yield as a blue crystal, 51.5 mg.  $^1\text{H}$  NMR (400 MHz,  $\text{CDCl}_3$ )  $\delta$  = 7.59 (s, 1H), 7.41 – 7.36 (m, 2H), 6.95 – 6.90 (m, 2H), 6.88 (dd,  $J=9.4, 2.6$  Hz, 2H), 6.76 – 6.70 (m, 2H), 2.92 (s, 6H), 2.13 (s, 3H);  $^{13}\text{C}$  NMR (75 MHz,  $\text{CDCl}_3$ )  $\delta$  = 168.63, 155.64, 147.88, 147.64, 132.46, 121.99, 120.66, 117.87, 114.19, 41.42, 24.46.

GC-MS (EI, 70 eV):  $m/z$  (rel int., %): 136.0 (14), 227.1 (15), 228.0 (29), 256.1 (8), 269.1 (16), 270.1 (100), 271.1 (18).

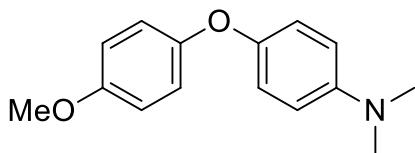

**4-(4-methoxyphenoxy)-*N,N*-dimethylaniline (3al):** The desired pure product was obtained in 21% yield as a brown oil, 15.1 mg.  $^1\text{H}$  NMR (400 MHz,  $\text{CDCl}_3$ )  $\delta$  = 6.92 (t,  $J=2.3$  Hz, 2H), 6.91 – 6.90 (m, 2H), 6.86 – 6.82 (m, 2H), 6.76 – 6.70 (m, 2H), 3.78 (s, 3H), 2.92 (s, 6H);  $^{13}\text{C}$  NMR (75 MHz,  $\text{CDCl}_3$ )  $\delta$  = 152.42, 149.05, 147.37, 119.94, 119.15, 114.81, 114.28, 55.83, 41.51.

GC-MS (EI, 70 eV):  $m/z$  (rel int., %): 136.0 (18), 228.0 (10), 242.1 (33), 243.0 (100), 244.1 (16).

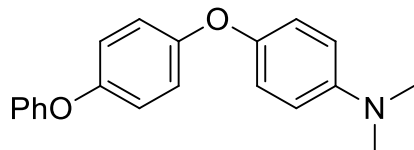

***N,N*-dimethyl-4-(4-phenoxyphenoxy)aniline (3am):** The desired pure product was obtained in 20% yield as a yellow oil, 63.8 mg.  $^1\text{H}$  NMR (400 MHz,  $\text{CDCl}_3$ )  $\delta$  = 7.35 – 7.28 (m, 2H), 7.06 (t,  $J$ =7.4 Hz, 1H), 7.02 – 6.98 (m, 2H), 6.98 – 6.96 (m, 2H), 6.95 (d,  $J$ =2.3 Hz, 2H), 6.95 – 6.89 (m, 2H), 6.79 – 6.72 (m, 2H), 2.94 (s, 6H);  $^{13}\text{C}$  NMR (75 MHz,  $\text{CDCl}_3$ )  $\delta$  = 158.32, 155.06, 151.57, 147.70, 129.83, 122.84, 120.74, 120.65, 118.72, 118.08, 117.31, 114.21, 41.44.

GC-MS (EI, 70 eV):  $m/z$  (rel int., %): 77.0 (8), 136.0 (17), 290.1 (6), 304.1(28), 305.1 (100), 306.1 (23).

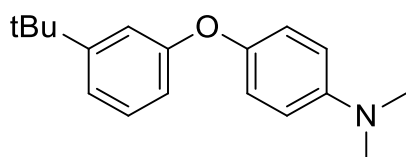

**4-(3-(*tert*-butyl)phenoxy)-*N,N*-dimethylaniline (3an):** The desired pure product was obtained in 53% yield as a yellow oil, 42.4 mg.  $^1\text{H}$  NMR (400 MHz,  $\text{CDCl}_3$ )  $\delta$  = 7.20 (t,  $J$ =8.2 Hz, 1H), 7.06 (d,  $J$ =1.6 Hz, 1H), 7.06 – 7.02 (m, 1H), 7.00 – 6.94 (m, 2H), 6.78 – 6.71 (m, 2H), 6.71 – 6.66 (m, 1H), 2.94 (s, 6H), 1.31 (s, 9H);  $^{13}\text{C}$  NMR (101 MHz,  $\text{CDCl}_3$ )  $\delta$  = 158.89, 153.38, 147.68, 129.09, 120.83, 119.27, 115.17, 114.21, 41.45, 34.94, 31.48.

GC-MS (EI, 70 eV):  $m/z$  (rel int., %): 121.0 (6), 136.0 (21), 239.1 (8), 254.1 (8), 268.1 (20), 269.1 (100), 270.1 (22).

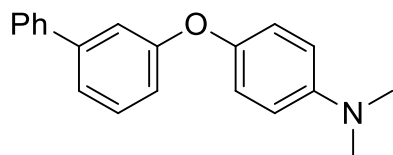

**4-([1,1'-biphenyl]-3-yloxy)-*N,N*-dimethylaniline (3ao):** The desired pure product was obtained in 47% yield as a brown oil, 40.6 mg.  $^1\text{H}$  NMR (400 MHz,  $\text{CDCl}_3$ )  $\delta$  = 7.57 (dt,  $J$ =8.3, 2.3 Hz, 2H), 7.43 (t,  $J$ =7.5, 2H), 7.39 – 7.31 (m, 2H), 7.29 – 7.25 (m, 1H), 7.23 – 7.19 (m, 1H), 7.06 – 7.00 (m, 2H), 6.93 (ddd,  $J$ =8.1, 2.5, 0.9 Hz, 1H), 6.80 – 6.74 (m, 2H), 2.96 (s, 6H);  $^{13}\text{C}$  NMR (75 MHz,  $\text{CDCl}_3$ )  $\delta$  = 147.77, 147.49, 143.01, 140.94, 129.97, 128.89, 127.61, 121.11, 121.03, 116.14, 116.10, 77.62, 77.20, 76.78, 41.43.

GC-MS (EI, 70 eV):  $m/z$  (rel int., %): 136.0 (14), 152.0 (8), 288.1 (27), 289.1 (100), 290.1 (21).

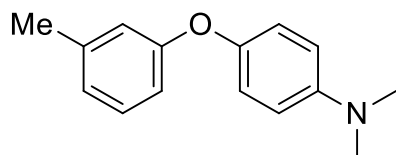

***N,N*-dimethyl-4-(*m*-tolylloxy)aniline (3ap):** The desired pure product was obtained in 31% yield as a red oil, 21.4 mg.  $^1\text{H}$  NMR (400 MHz,  $\text{CDCl}_3$ )  $\delta$  = 7.16 (t,  $J$ =7.8 Hz, 1H), 7.01 – 6.93 (m, 2H), 6.83 (d,  $J$ =7.5 Hz, 1H), 6.76 (s, 2H), 6.75 (d,  $J$ =4.3 Hz, 1H), 6.73 (d,  $J$ =3.6 Hz, 1H), 2.94 (s, 6H), 2.31 (s, 3H);  $^{13}\text{C}$  NMR (101 MHz,  $\text{CDCl}_3$ )  $\delta$  = 159.23, 147.75, 147.62, 139.81, 129.40, 122.96, 121.09, 118.00, 114.39, 114.15, 41.42, 21.62.

GC-MS (EI, 70 Ev):  $m/z$  (rel int., %): 65.0 (13), 91.0 (10), 108.0 (5), 136.0 (45), 137.0 (4), 212.0 (9), 226.1 (46), 227.1 (100), 228.1 (17).

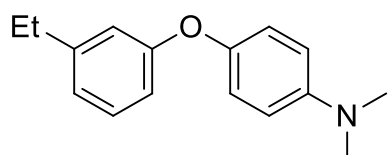

**4-(3-ethylphenoxy)-*N,N*-dimethylaniline (3aq):** The desired pure product was obtained in 18% yield as a brown oil, 12.9 mg.  $^1\text{H}$  NMR (400 MHz,  $\text{CDCl}_3$ )  $\delta$  = 7.20 (t,  $J$ =7.9 Hz, 1H), 6.99 (d,  $J$ =2.3 Hz, 1H), 6.97 (d,  $J$ =2.3 Hz, 1H), 6.90 – 6.81 (m, 2H), 6.79 – 6.75 (m, 2H), 6.74 (d,  $J$ =3.5 Hz, 1H), 2.95 (s, 6H), 2.62 (q,  $J$ =7.6 Hz, 2H), 1.23 (t,  $J$ =7.6 Hz, 3H);  $^{13}\text{C}$  NMR (75 MHz,  $\text{CDCl}_3$ )  $\delta$  = 159.23, 147.70, 147.62, 146.25, 129.44, 121.73, 116.92, 114.49, 114.15, 41.41, 28.98, 15.66.

GC-MS (EI, 70 Ev):  $m/z$  (rel int., %): 77.0 (5), 136.0 (32), 226.0 (8), 240.1 (8), 241.1 (100), 242.1 (19).

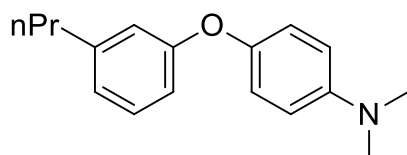

***N,N*-dimethyl-4-(3-propylphenoxy)aniline (3ar):** The desired pure product was obtained in 22% yield as a brown oil, 16.7 mg.  $^1\text{H}$  NMR (400 MHz,  $\text{CDCl}_3$ )  $\delta$  = 7.18 (t,  $J$ =7.8 Hz, 1H), 6.99 – 6.94 (m, 2H), 6.84 (d,  $J$ =7.5 Hz, 1H), 6.79 (s, 1H), 6.76 (q,  $J$ =4.9, 4.3 Hz, 2H), 6.73 (d,  $J$ =3.2 Hz, 1H), 2.94 (s, 6H), 2.57 – 2.50 (m, 2H), 1.65 – 1.59 (m, 2H), 0.94 (t,  $J$ =7.3 Hz, 3H);  $^{13}\text{C}$  NMR (101 MHz,  $\text{CDCl}_3$ )  $\delta$  = 159.14, 147.72, 144.71, 129.34, 122.40, 120.98, 114.60, 114.17, 41.43, 38.17, 24.62, 14.01.

GC-MS (EI, 70 eV):  $m/z$  (rel int., %): 57.0 (10), 91.0 (5), 197.0 (8), 225.1 (100), 226.1 (14), 227.1 (34), 240.1 (17), 242.1 (5).

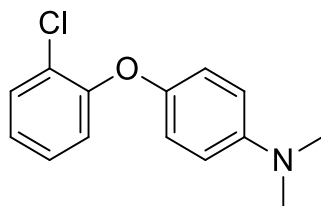

**4-(2-chlorophenoxy)-*N,N*-dimethylaniline (3as):** The desired pure product was obtained in 17% yield as a yellow oil, 12.9 mg.  $^1\text{H}$  NMR (400 MHz,  $\text{CDCl}_3$ )  $\delta$  = 7.42 (dd,  $J=7.9, 1.6$  Hz, 1H), 7.17 – 7.10 (m, 1H), 7.01 – 6.95 (m, 2H), 6.94 – 6.80 (m, 2H), 6.78 – 6.69 (m, 2H), 2.94 (s, 6H);  $^{13}\text{C}$  NMR (101 MHz,  $\text{CDCl}_3$ )  $\delta$  = 154.64, 147.91, 130.69, 124.30, 123.23, 120.52, 118.39, 114.12, 41.37.

GC-MS (EI, 70 eV):  $m/z$  (rel int., %): 75.0 (6), 136.0 (43), 232.0 (6), 246.0 (51), 247.0 (100), 248.0 (31), 249.0 (33).

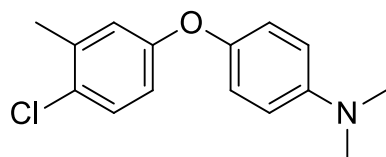

**4-(4-chloro-3-methylphenoxy)-*N,N*-dimethylaniline (3at):** The desired pure product was obtained in 71% yield as a red oil, 111.6 mg.  $^1\text{H}$  NMR (400 MHz,  $\text{CDCl}_3$ )  $\delta$  = 7.18 (d,  $J=8.7$  Hz, 1H), 6.95 – 6.89 (m, 2H), 6.79 (d,  $J=2.9$  Hz, 1H), 6.73 – 6.69 (m, 2H), 6.69 – 6.66 (m, 1H), 2.91 (s, 6H), 2.29 (s, 3H);  $^{13}\text{C}$  NMR (101 MHz,  $\text{CDCl}_3$ )  $\delta$  = 157.78, 147.88, 147.22, 137.31, 129.82, 120.99, 119.60, 115.97, 114.01, 41.25, 20.37.

GC-MS (EI, 70 eV):  $m/z$  (rel int., %): 136.0 (40), 246.0 (8), 260.0 (47), 261.0 (100), 262.0 (31), 263.0 (33).

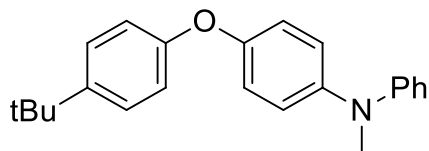

**4-(4-*tert*-butylphenoxy)-*N*-methyl-*N*-phenylaniline (3ba):** The desired pure product was obtained in 12% yield as a yellow oil, 12.3 mg.  $^1\text{H}$  NMR (300 MHz,  $\text{CDCl}_3$ )  $\delta$  = 7.29 (d,  $J=7.7$  Hz, 2H), 7.21 – 7.15 (m, 3H), 7.13 (s, 2H), 7.01 – 6.93 (m, 2H), 6.90 (s, 1H), 6.84 (d,  $J=8.7$  Hz, 2H), 6.77 – 6.61 (m, 2H), 2.94 (s, 3H), 1.68 (s, 9H);  $^{13}\text{C}$  NMR (151 MHz,  $\text{CDCl}_3$ )  $\delta$  = 149.23, 129.36, 126.67, 124.36, 121.44, 120.63, 120.08, 118.07, 40.41, 31.70.

GC-MS (EI, 70 eV):  $m/z$  (rel int., %): 77.1 (6), 143.9 (14), 167.1 (11), 198.1 (19), 281.1 (6), 316.2 (38), 317.2 (10), 331.2 (100), 332.2 (26).

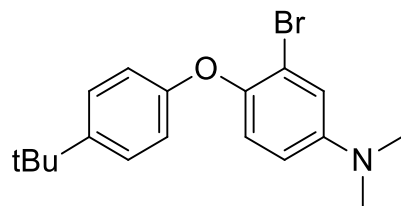

**3-bromo-4-(4-(*tert*-butyl)phenoxy)-*N,N*-dimethylaniline (3ca):** The desired pure product was obtained in 11% yield as a yellow oil, 11.9 mg.  $^1\text{H}$  NMR (400 MHz,  $\text{CDCl}_3$ )  $\delta$  = 7.30 (d,  $J$ =2.2 Hz, 1H), 7.28 (d,  $J$ =2.1 Hz, 2H), 6.97 – 6.93 (m, 2H), 6.84 – 6.80 (m, 2H), 6.65 (dd,  $J$ =9.0, 3.0 Hz, 1H), 2.94 (s, 6H), 1.30 (s, 9H);  $^{13}\text{C}$  NMR (101 MHz,  $\text{CDCl}_3$ )  $\delta$  = 156.39, 148.66, 145.01, 143.75, 126.49, 122.87, 117.00, 116.83, 116.02, 112.99, 41.05, 34.36, 31.70.

GC-MS (EI, 70 eV):  $m/z$  (rel int., %): 151.1 (22), 179.1 (22), 180.1 (35), 181.1 (32), 301.1 (11), 317.1 (26), 333.1 (9), 348.2 (100), 349.2 (19).

## 6. NMR Spectra of obtained products

### Compound 3aa

#### $^1\text{H}$ NMR

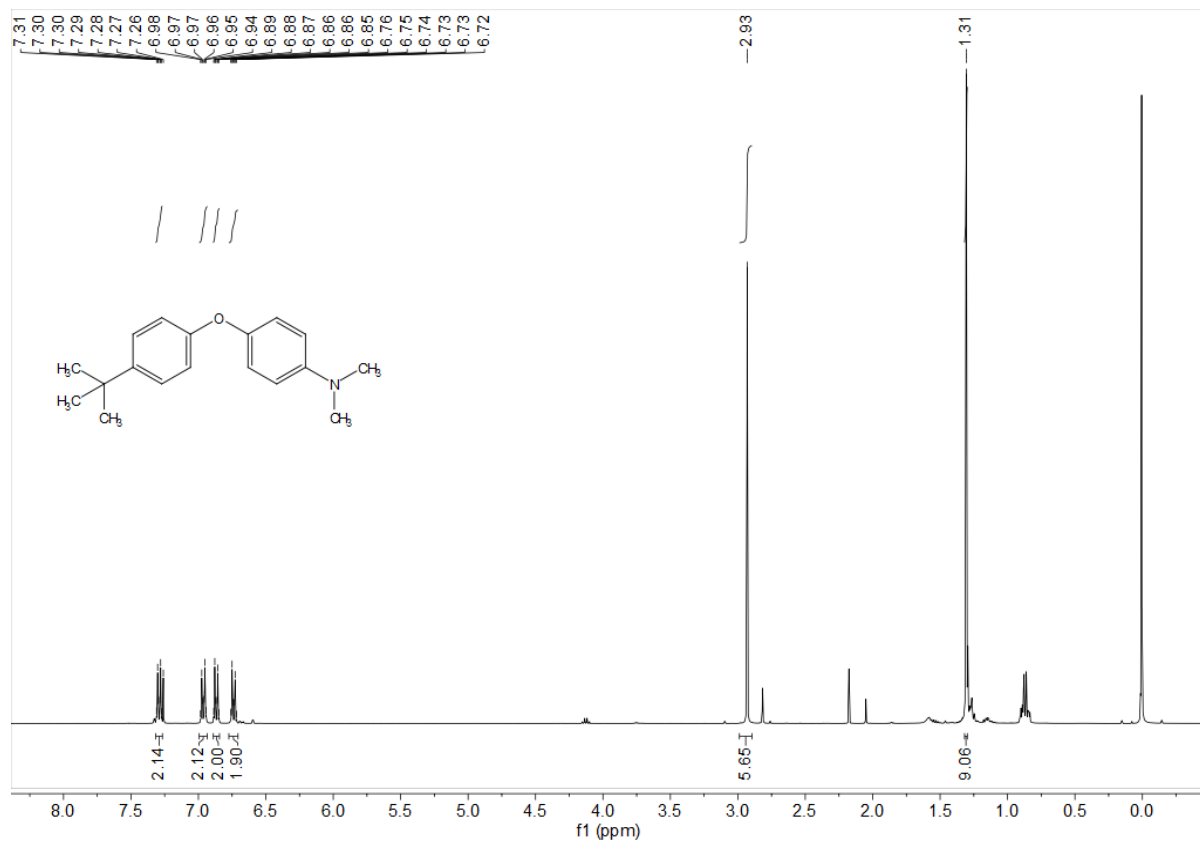

# <sup>13</sup>C NMR

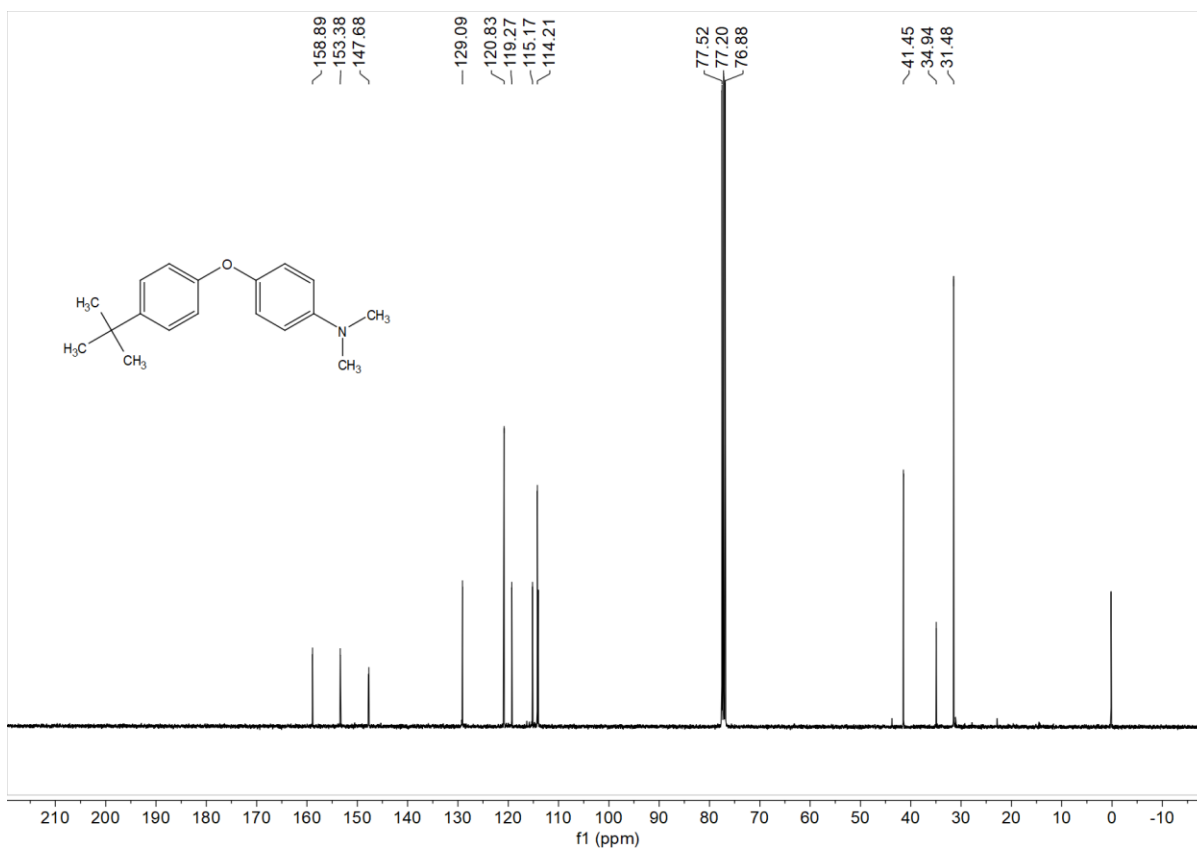

# Compound 3ab

## <sup>1</sup>H NMR

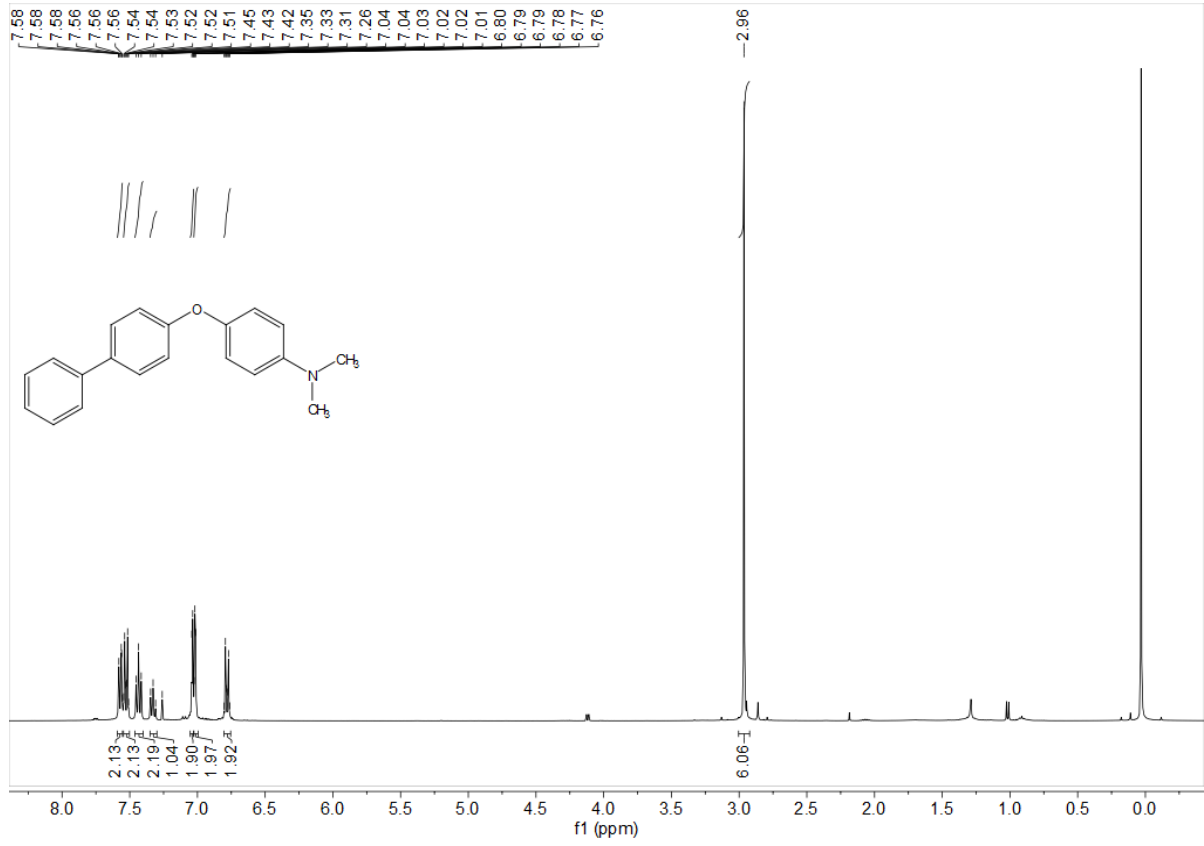



# <sup>13</sup>C NMR

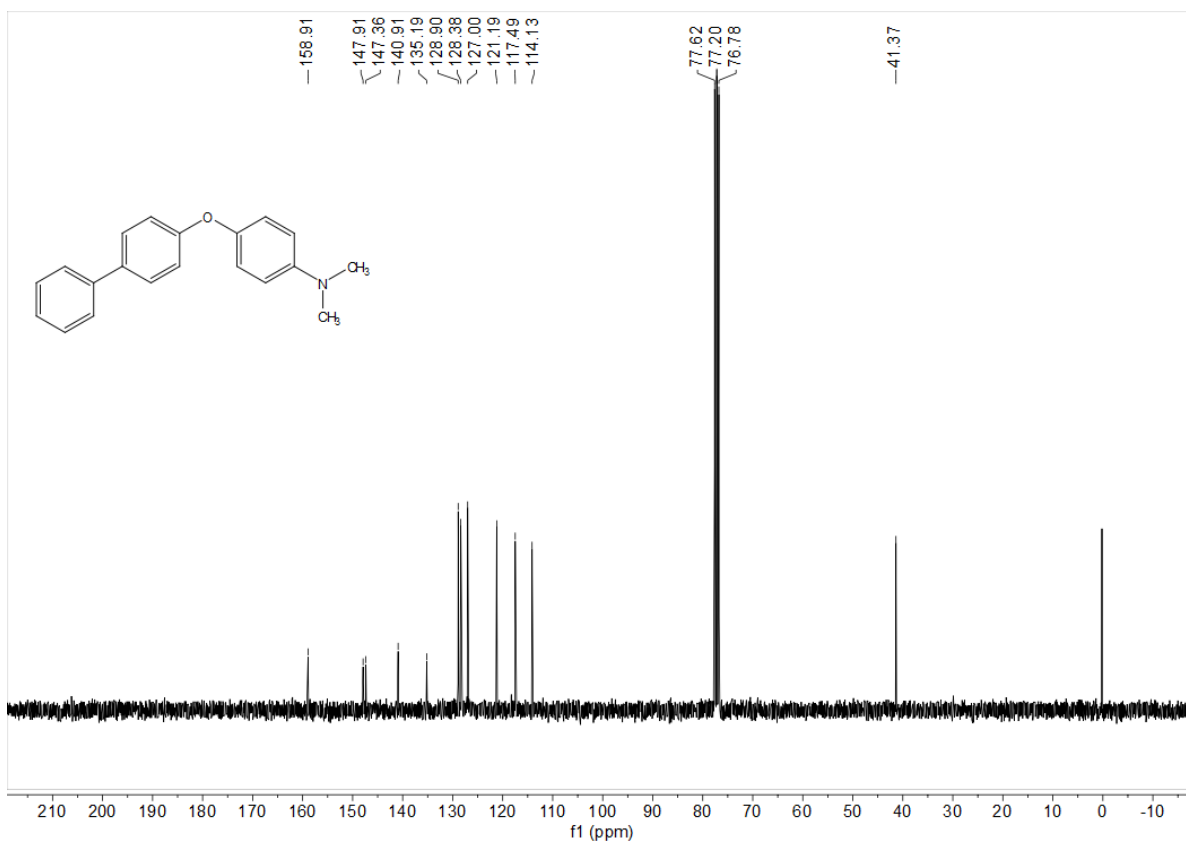

# Compound 3ac

## <sup>1</sup>H NMR

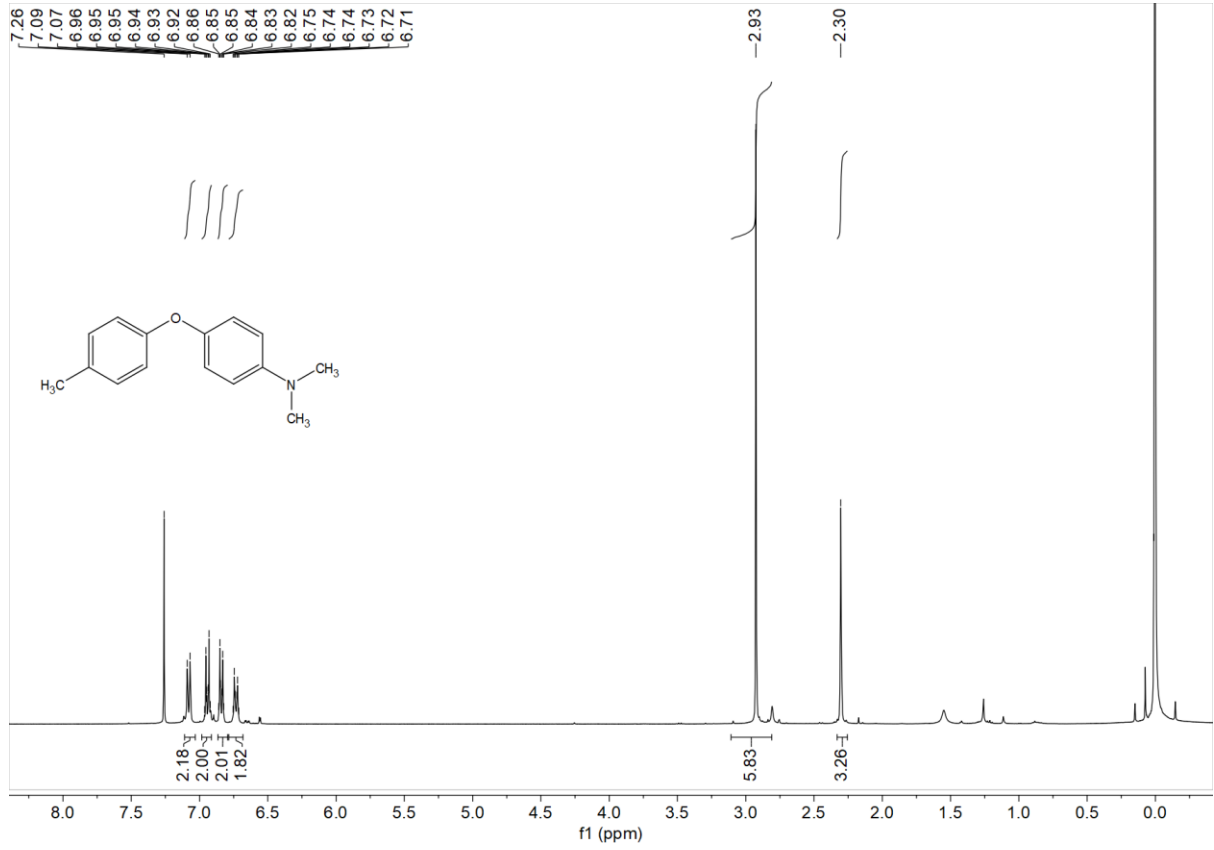

# <sup>13</sup>C NMR

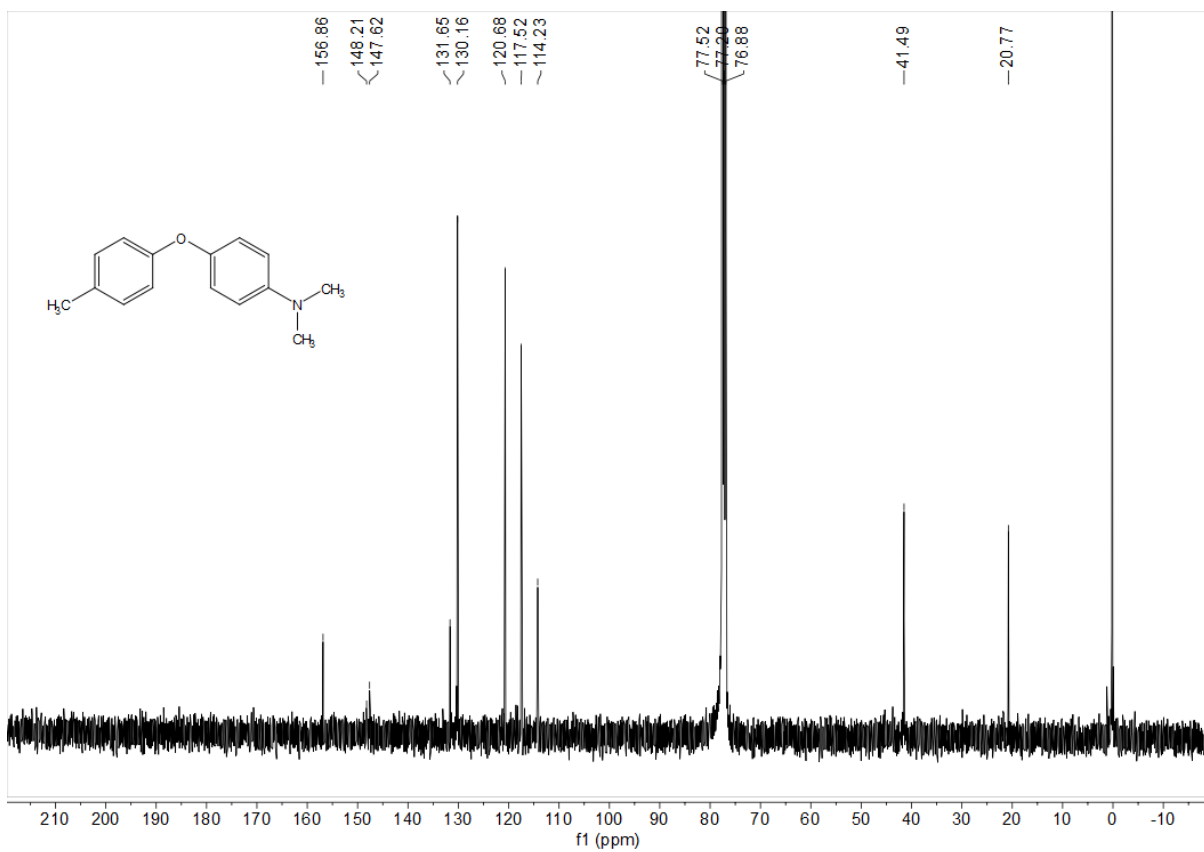

# Compound 3ad

## <sup>1</sup>H NMR

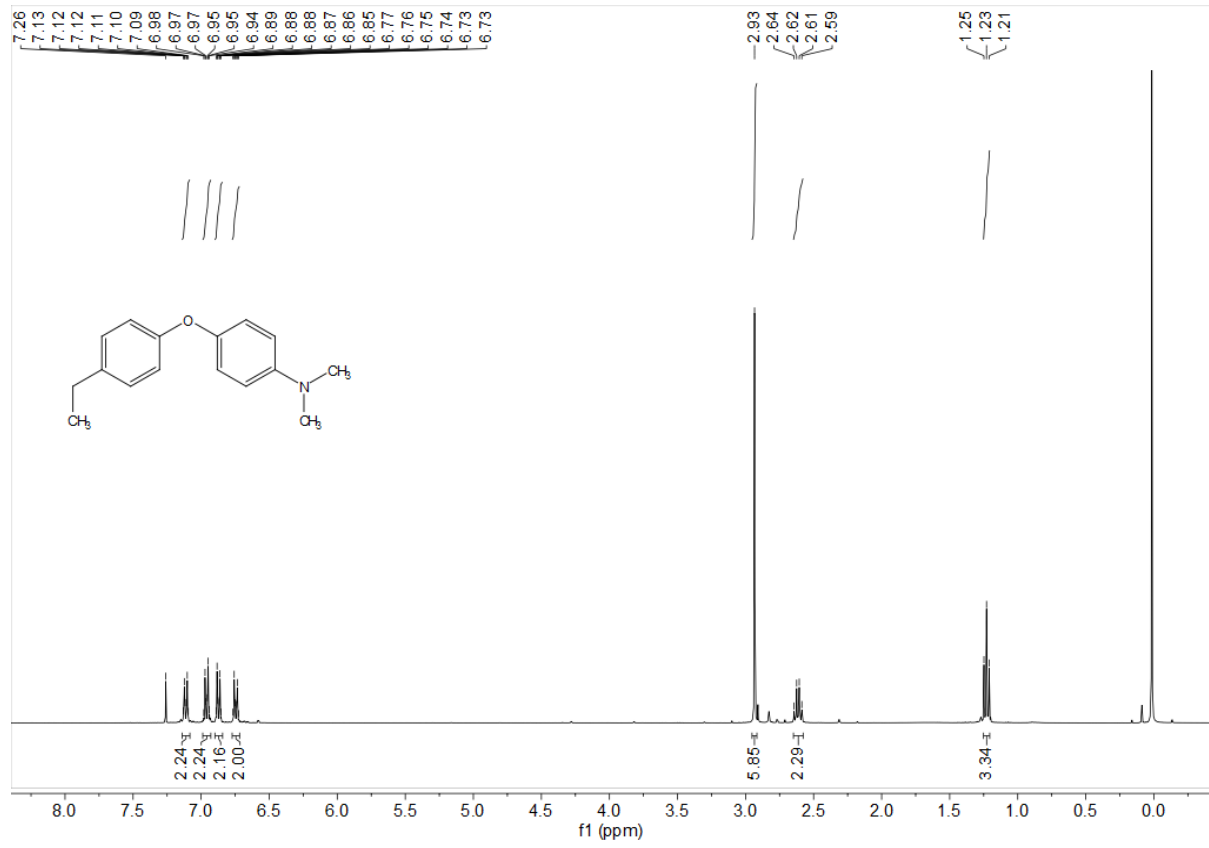

# <sup>13</sup>C NMR

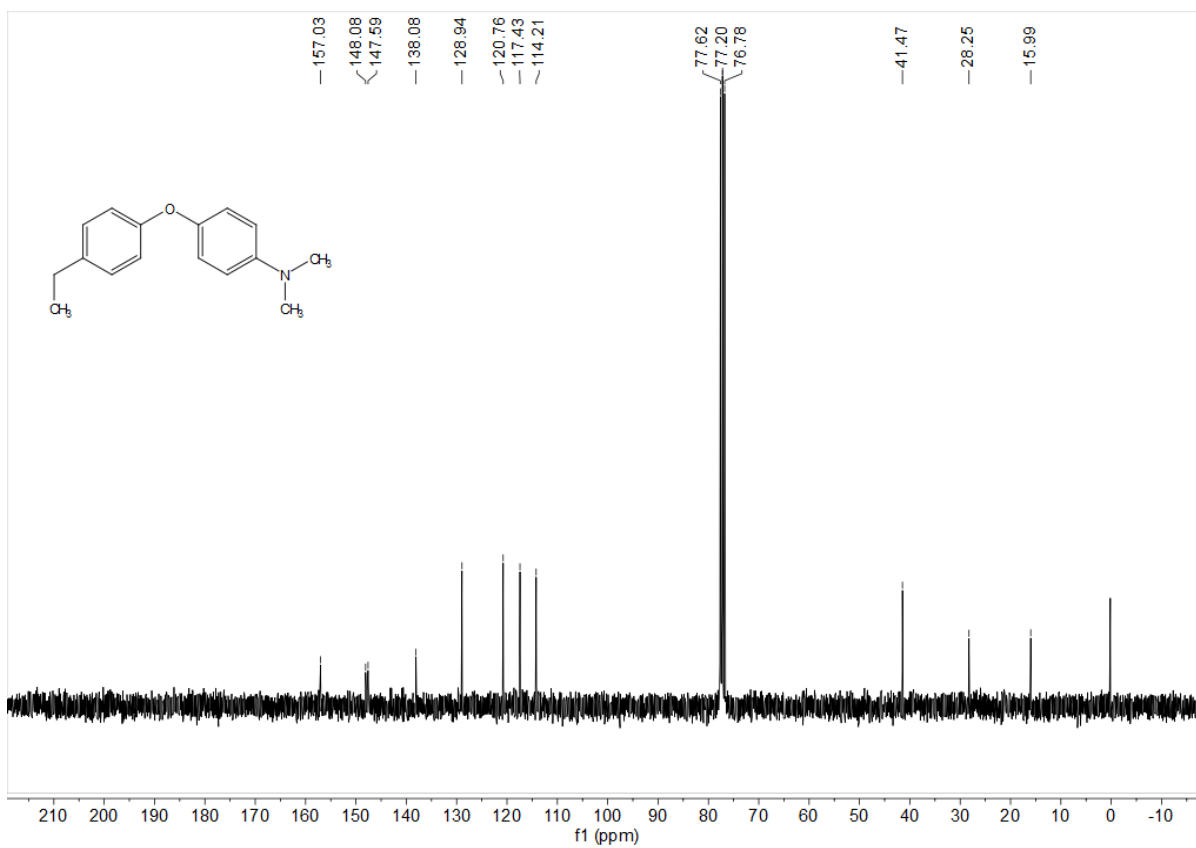

# Compound 3ae

## <sup>1</sup>H NMR

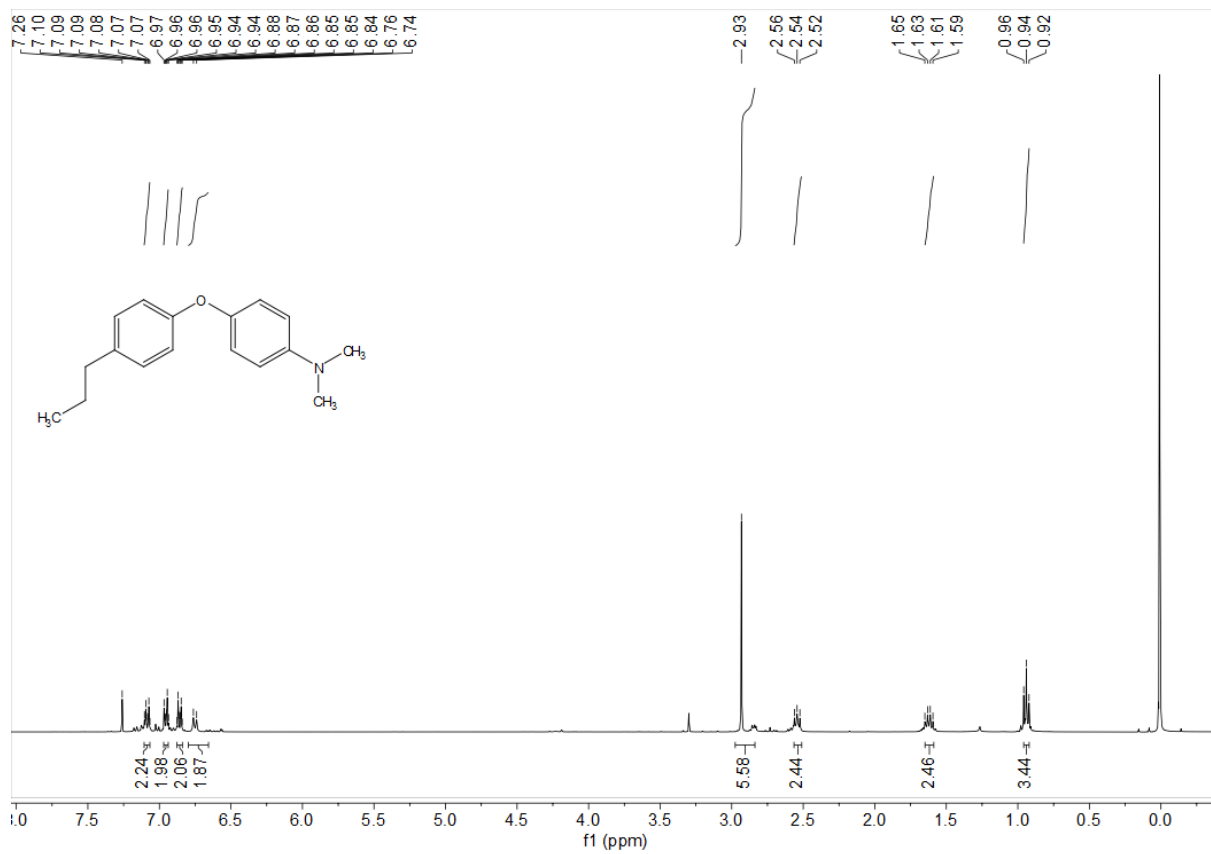

# <sup>13</sup>C NMR

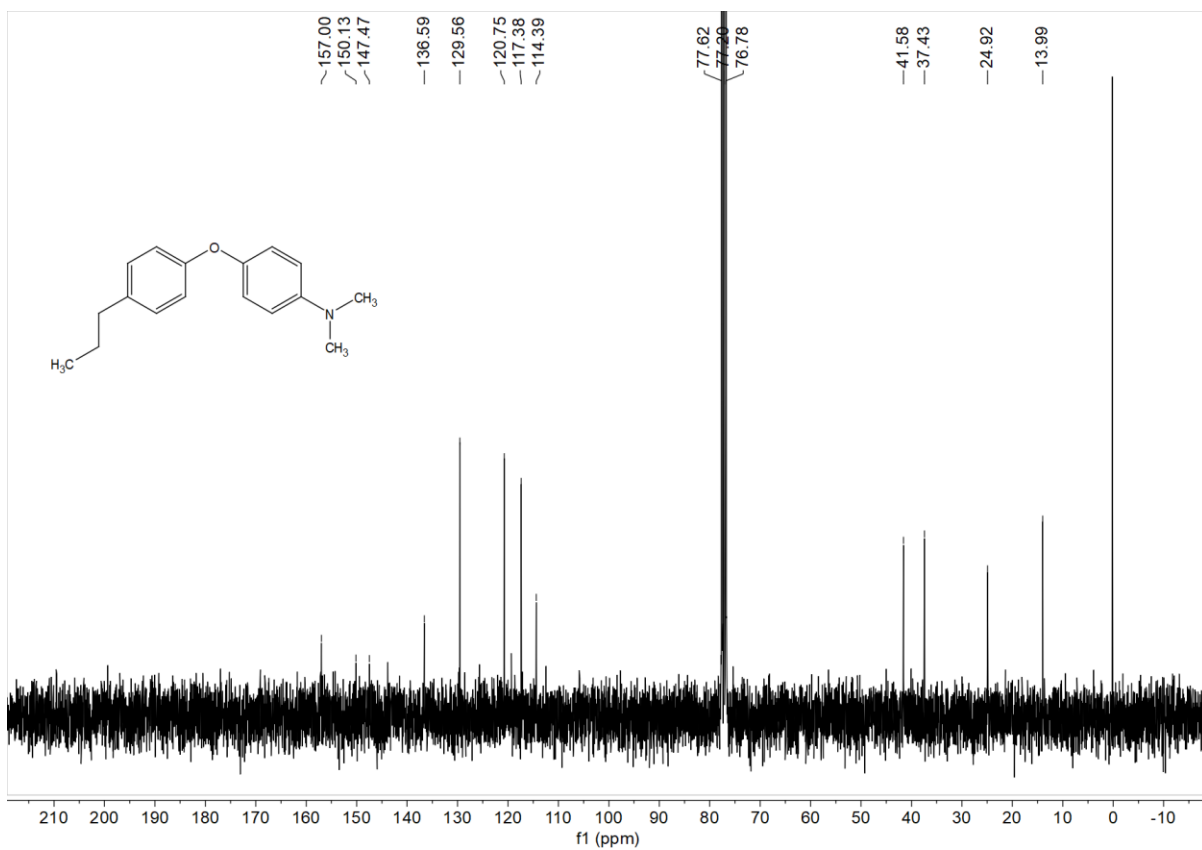

# Compound 3af

## <sup>1</sup>H NMR

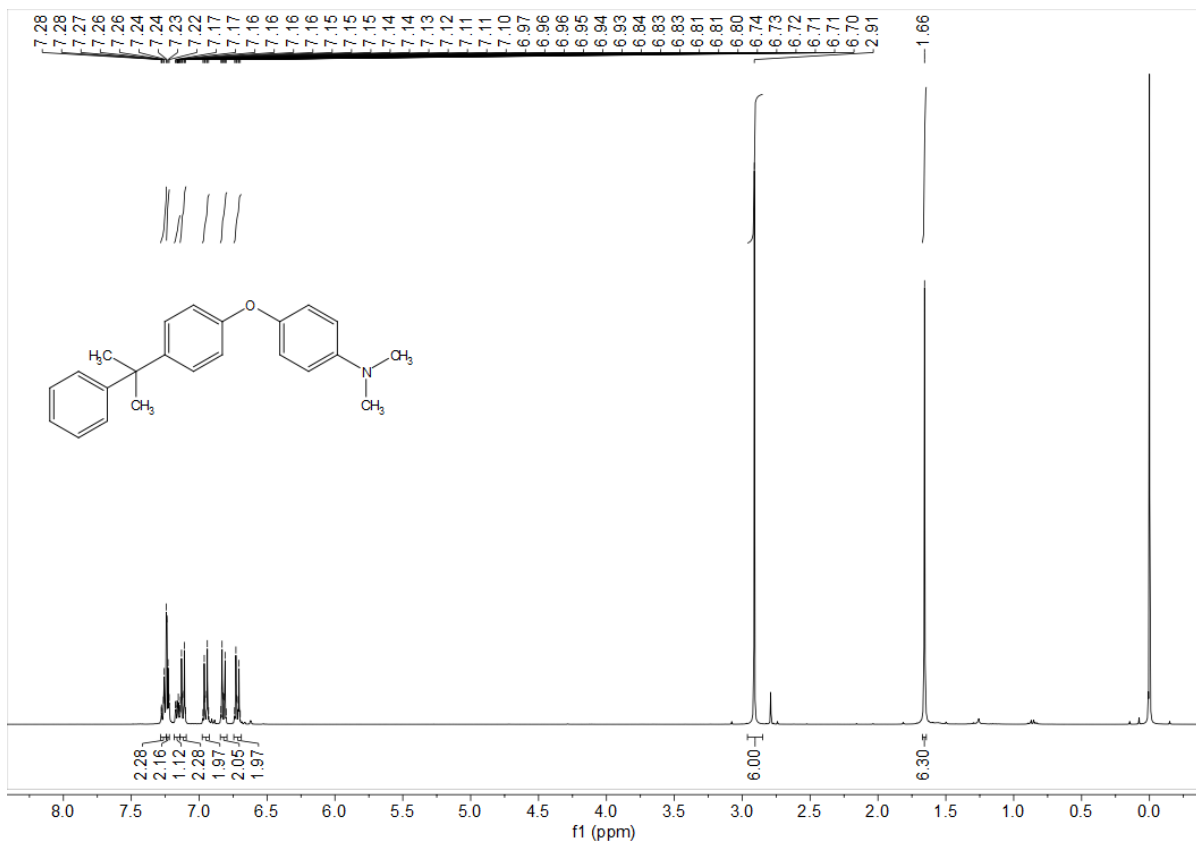



# <sup>13</sup>C NMR

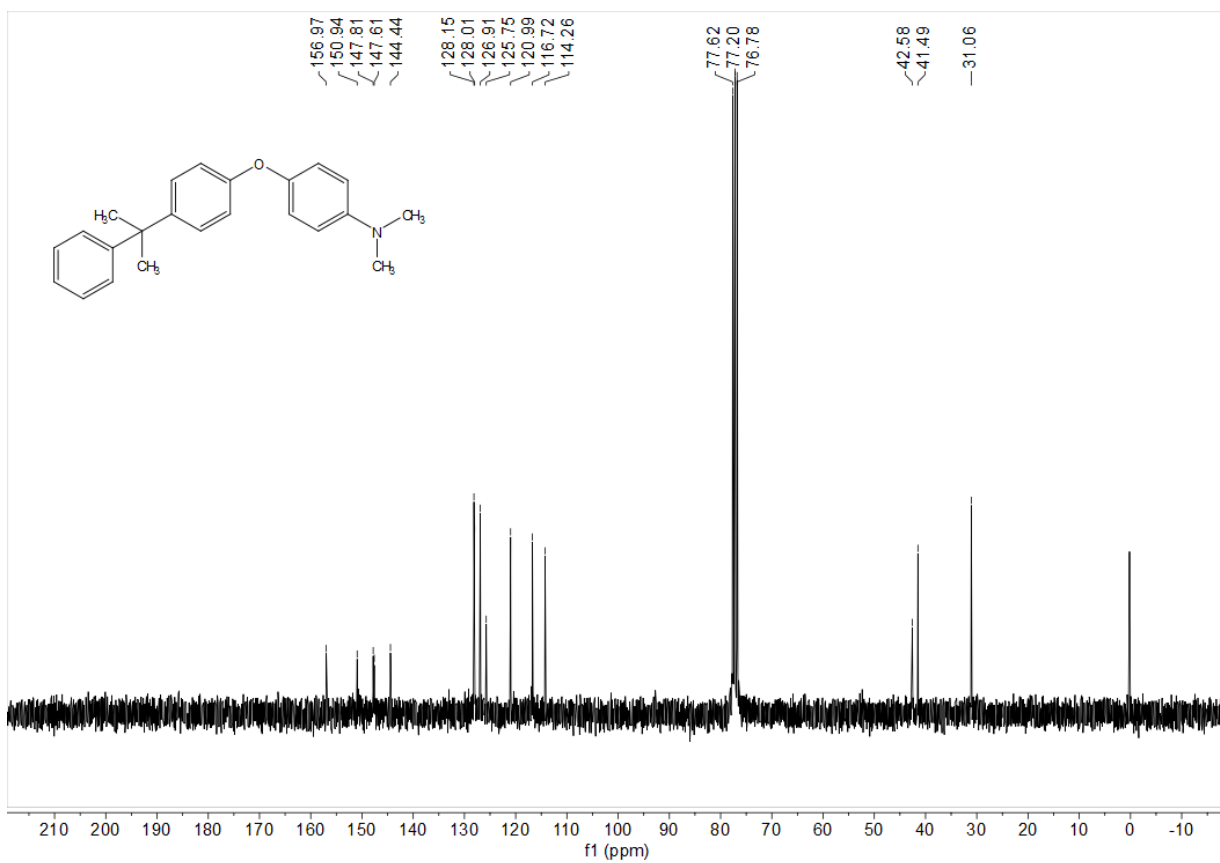

# Compound 3ag

## <sup>1</sup>H NMR

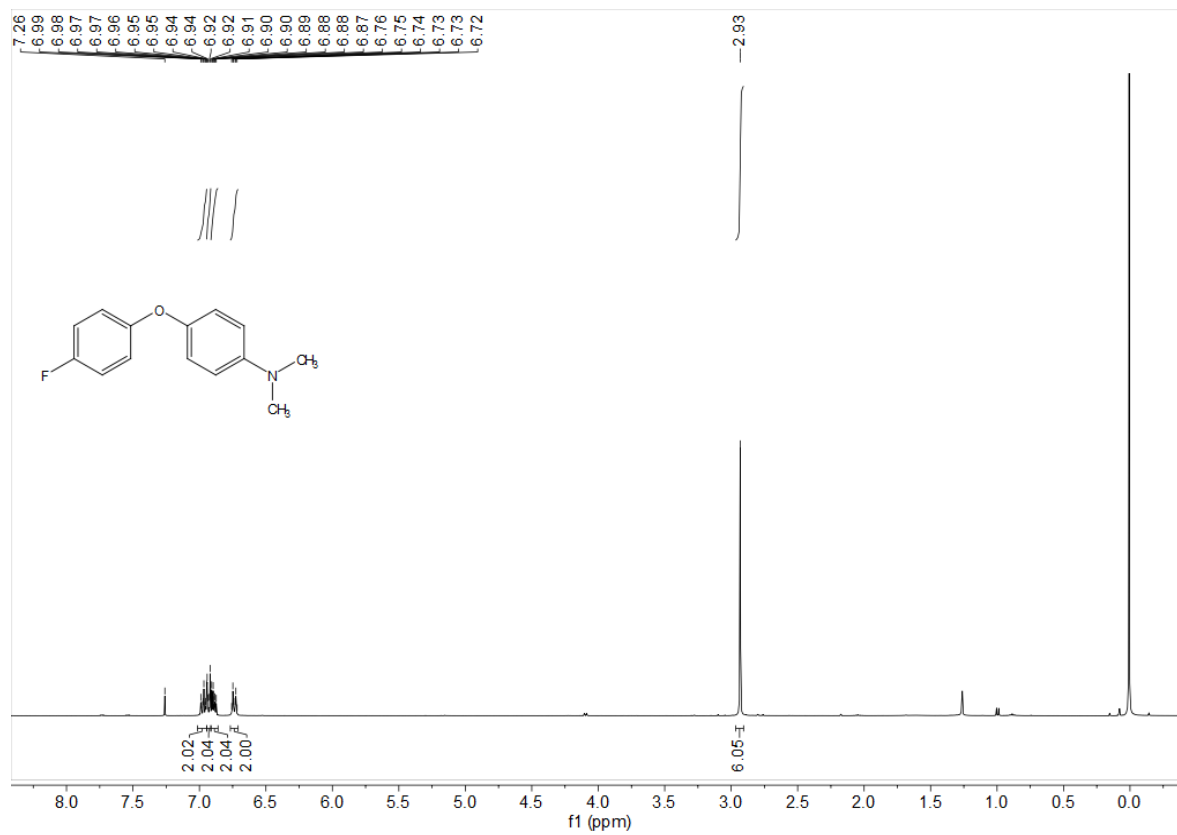

# <sup>13</sup>C NMR

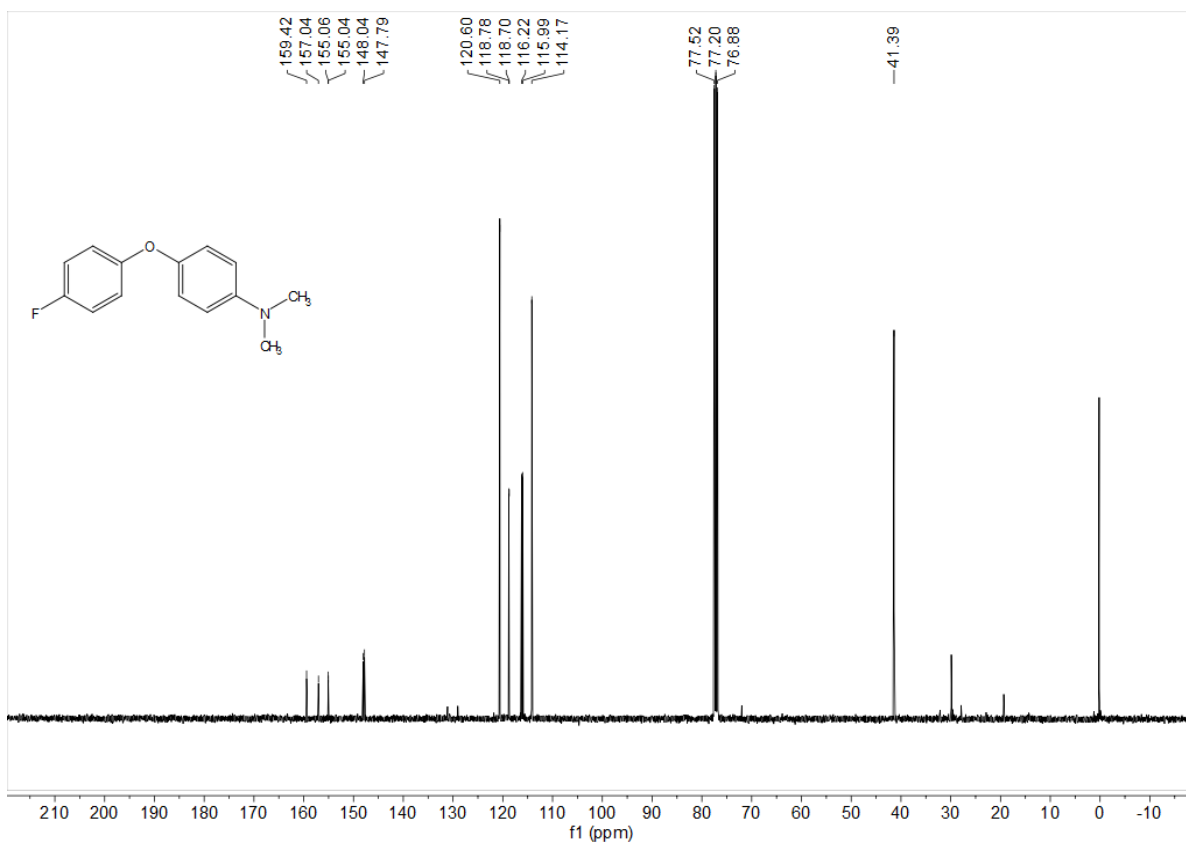

# <sup>19</sup>F NMR

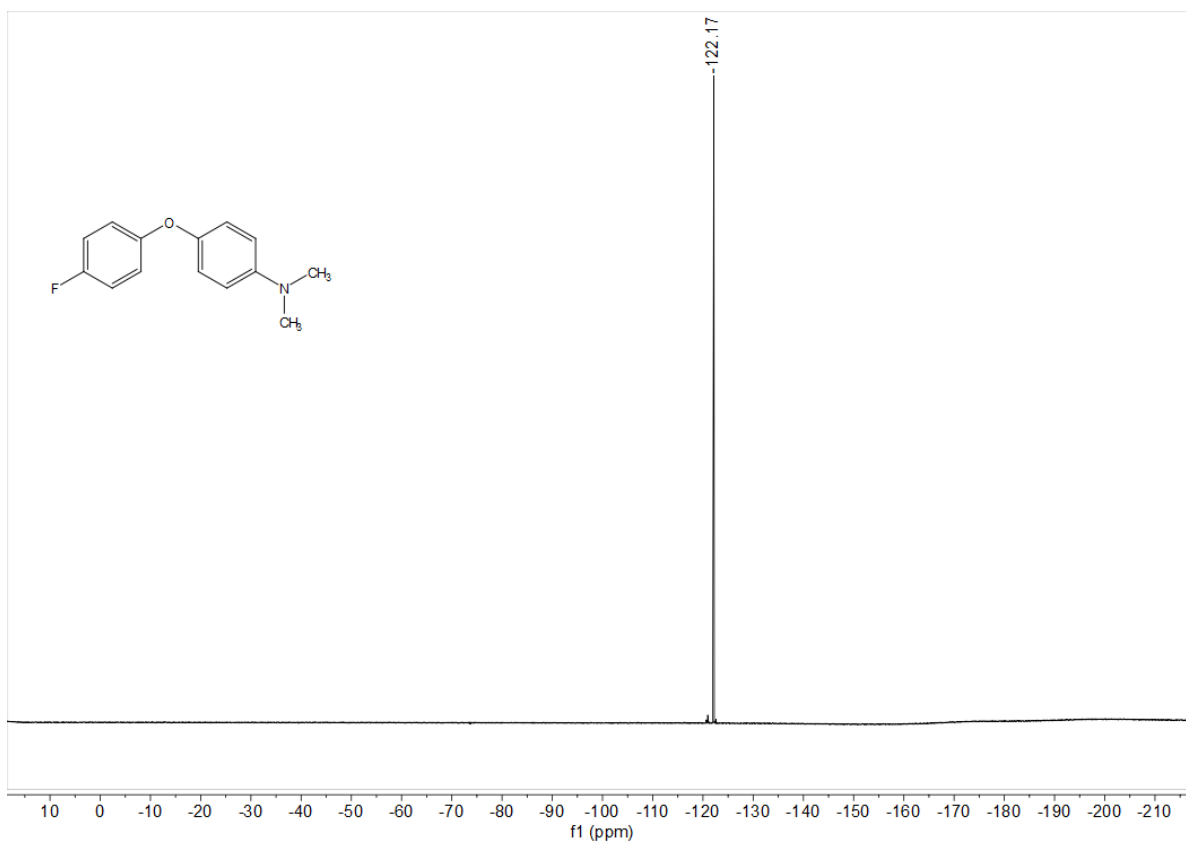

# Compound 3ah

## <sup>1</sup>H NMR

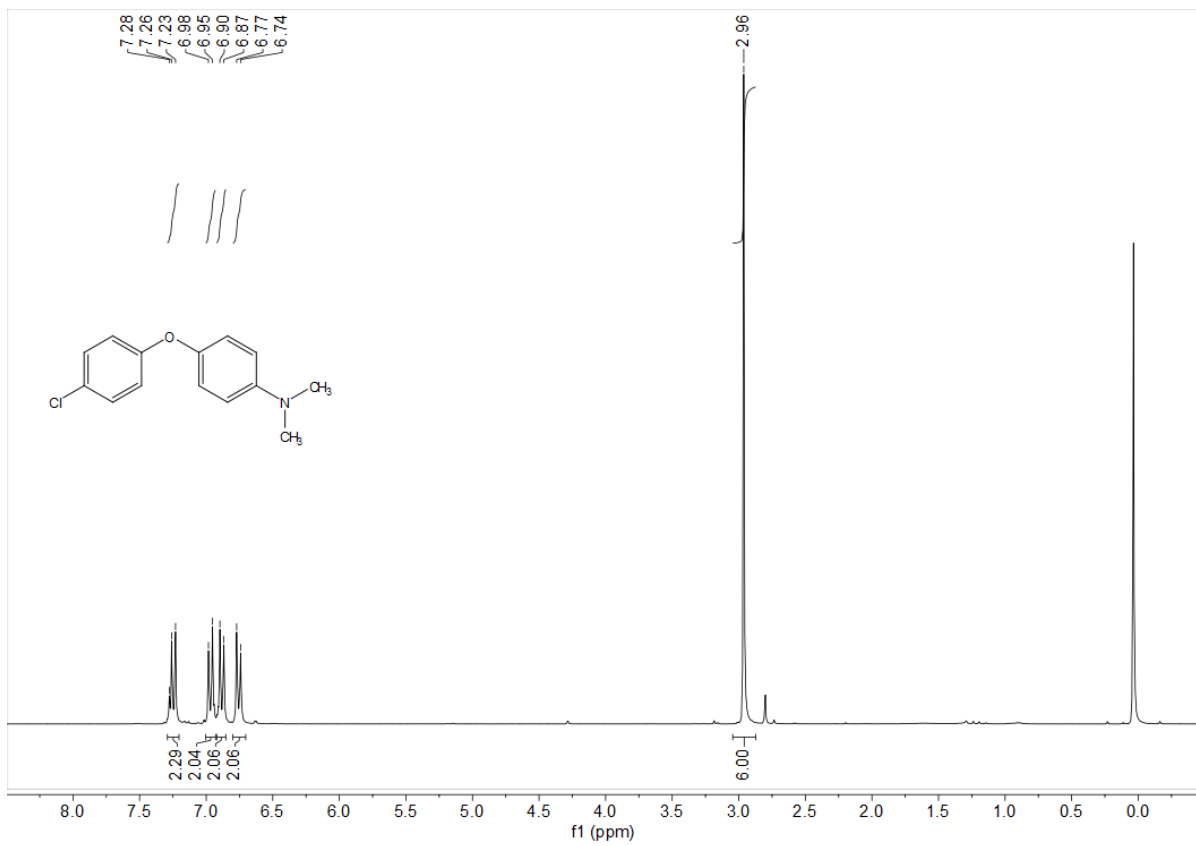

# <sup>13</sup>C NMR

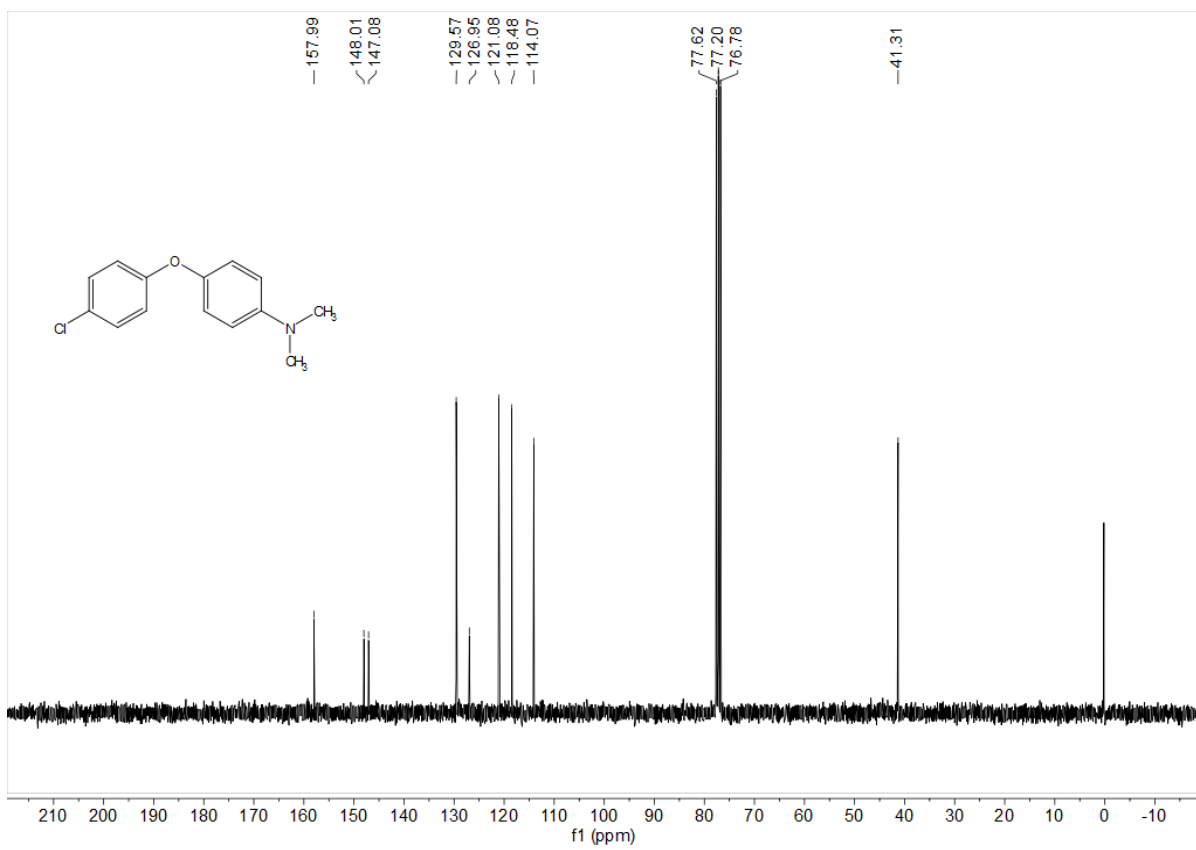

# Compound 3ai

## <sup>1</sup>H NMR

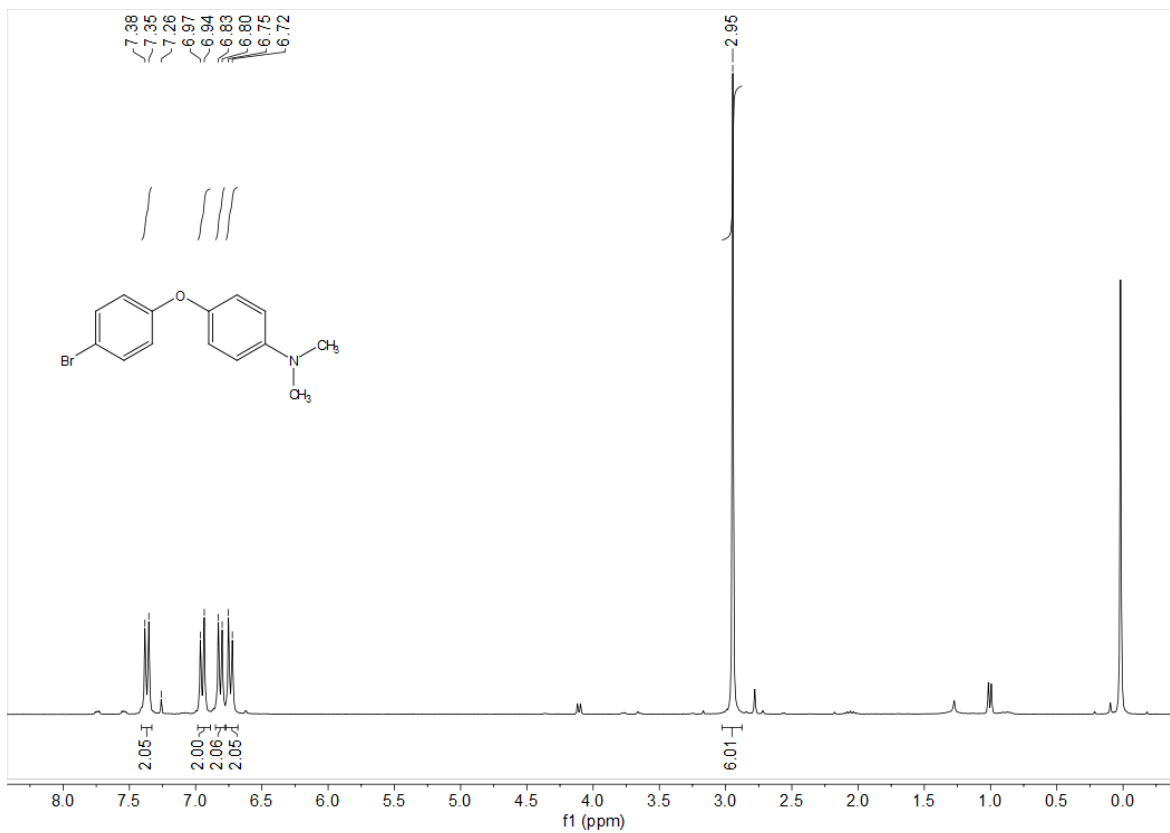

# <sup>13</sup>C NMR

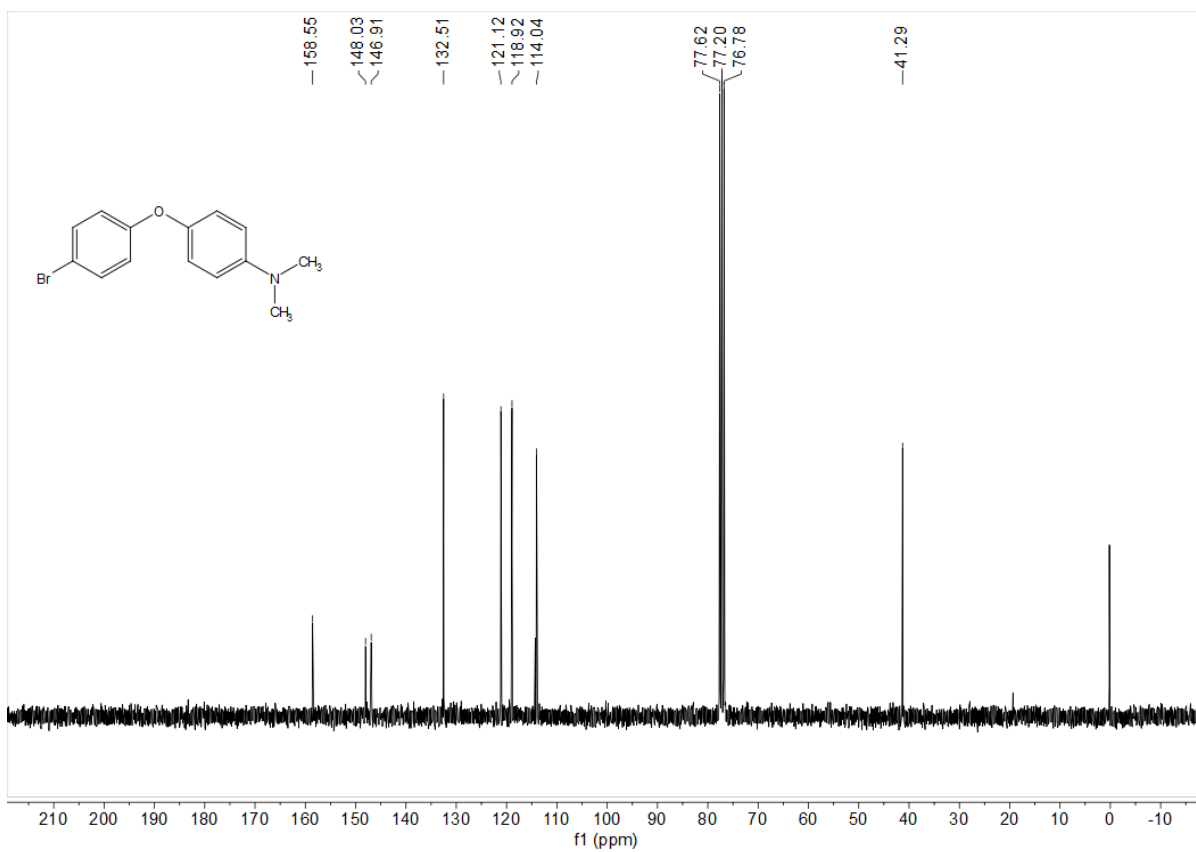



# Compound 3aj

## <sup>1</sup>H NMR

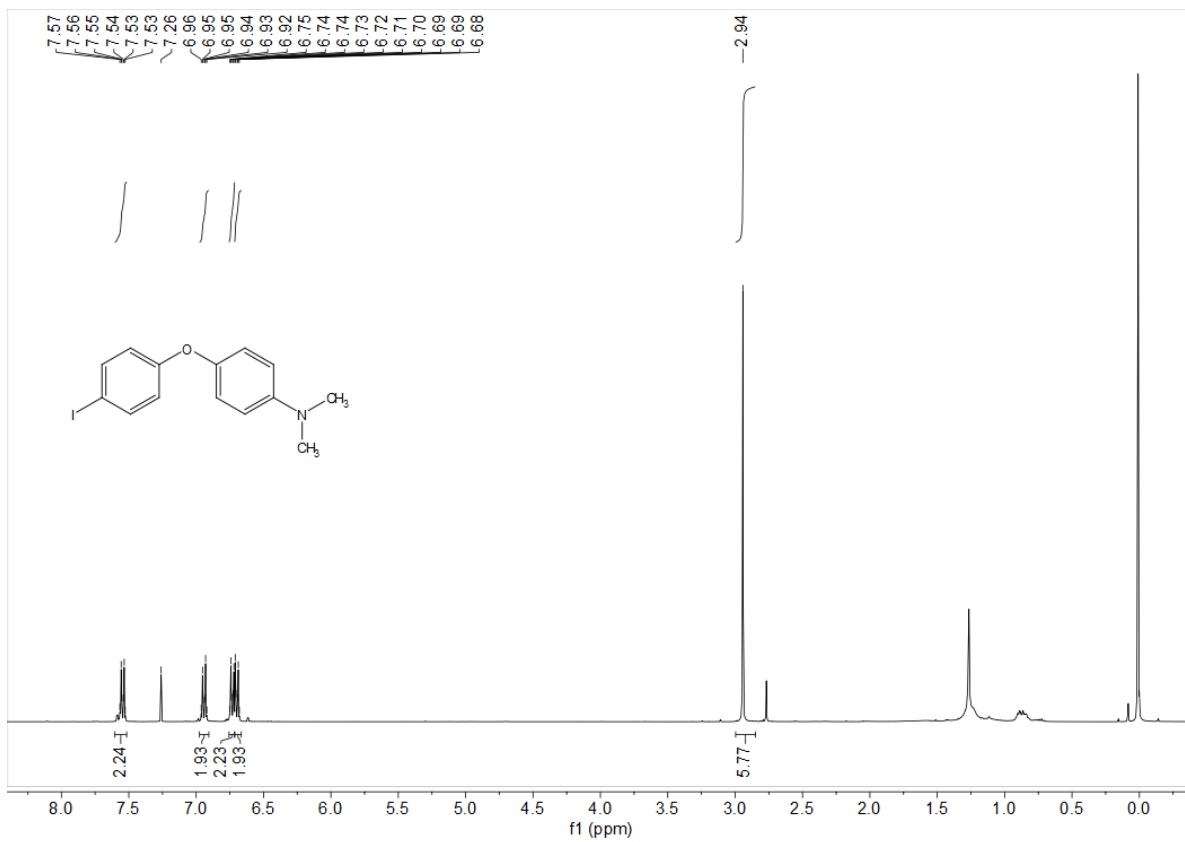

# <sup>13</sup>C NMR

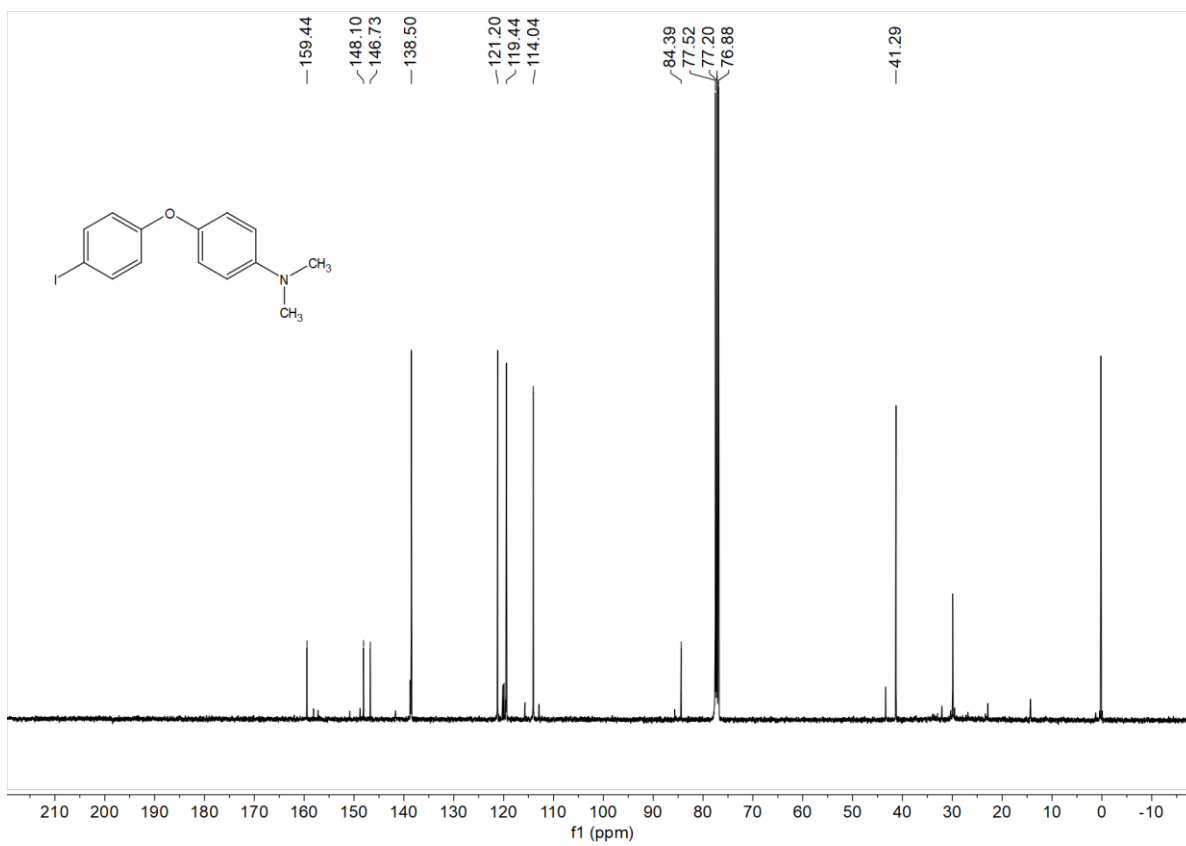

# Compound 3ak

## <sup>1</sup>H NMR

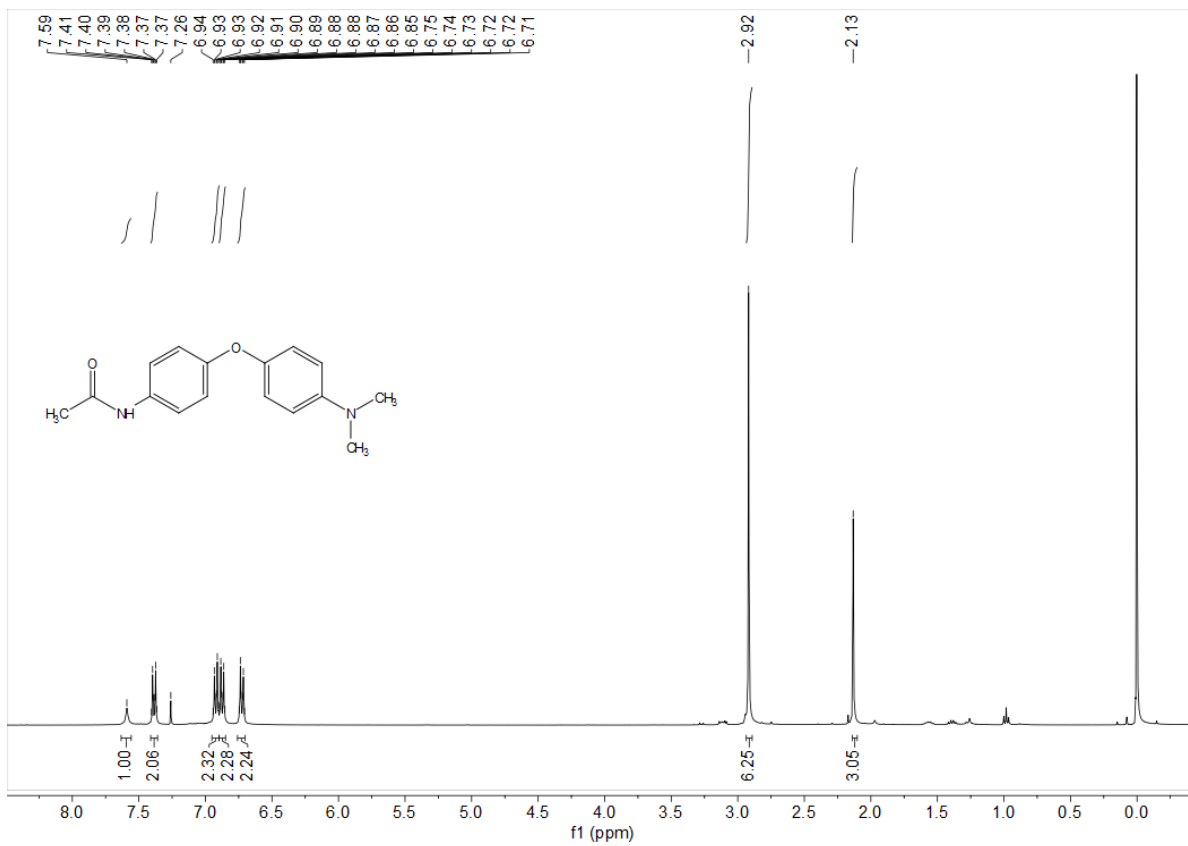

# <sup>13</sup>C NMR

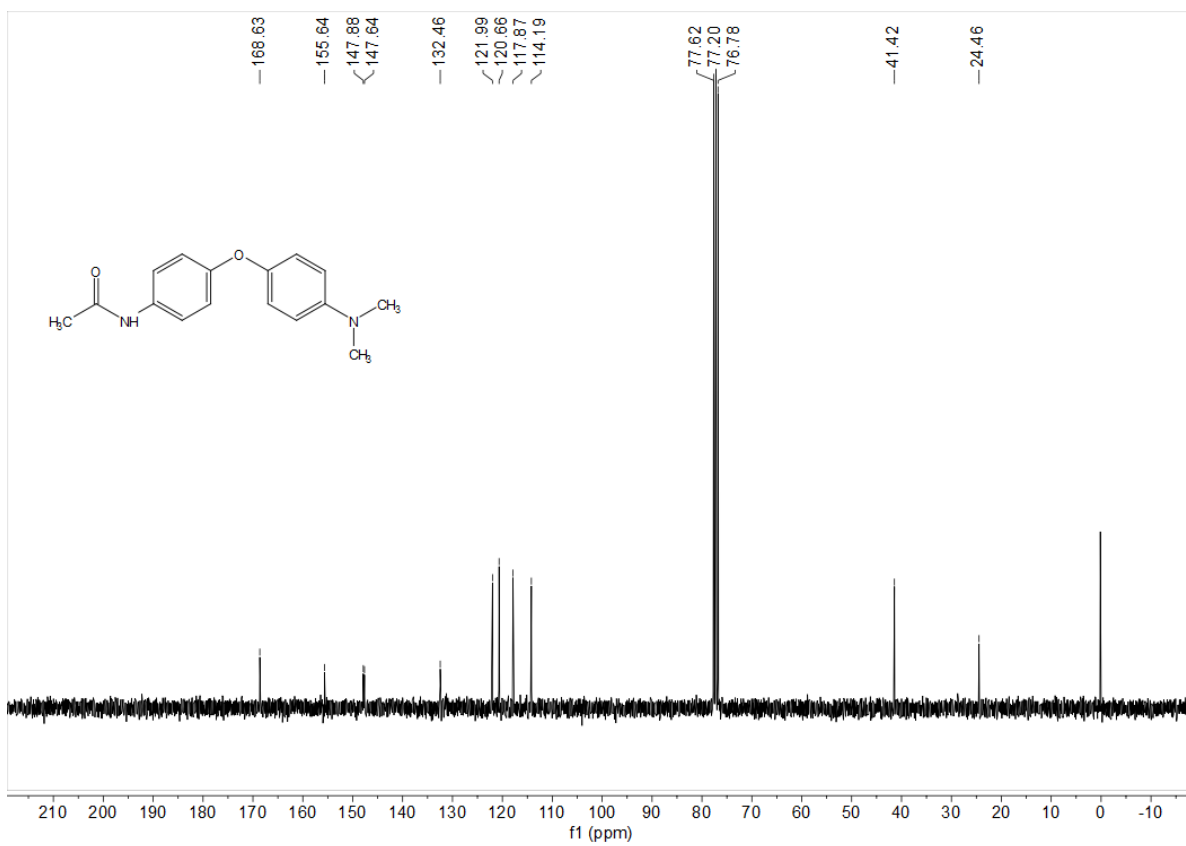

# Compound 3al

## <sup>1</sup>H NMR

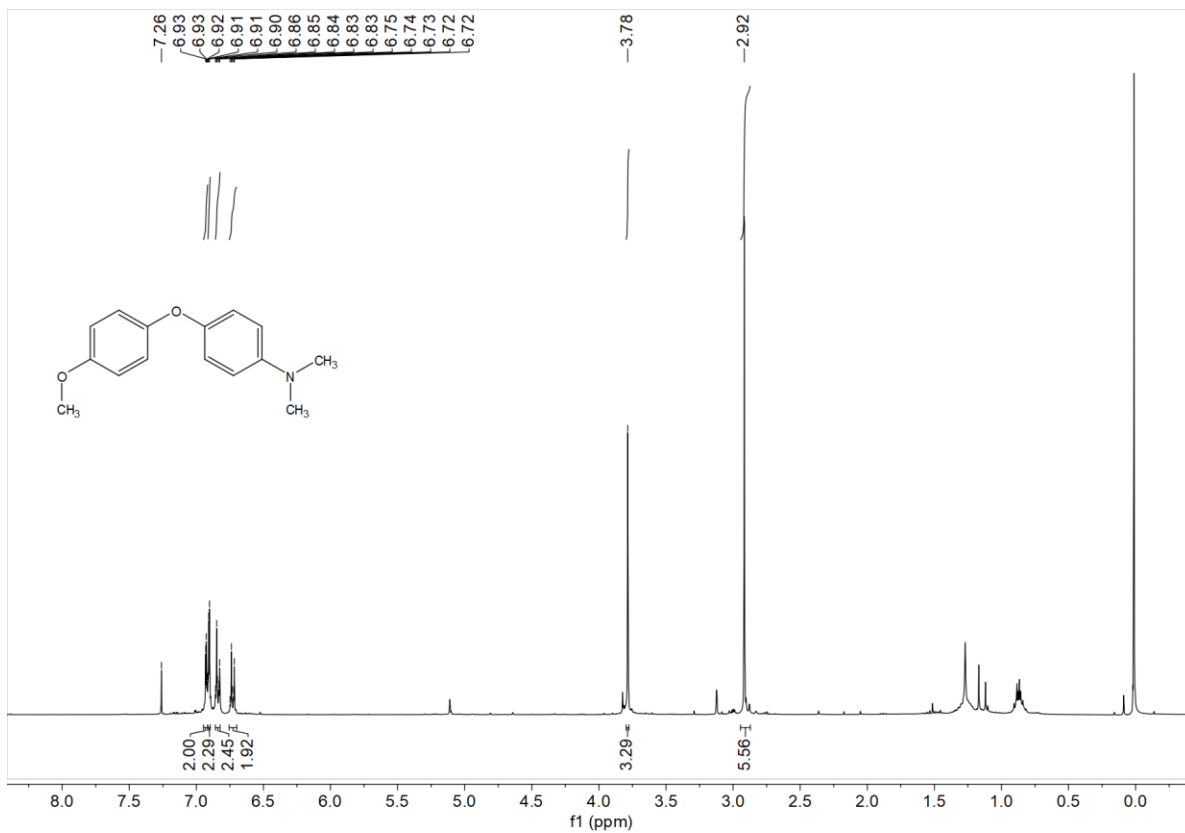

# <sup>13</sup>C NMR

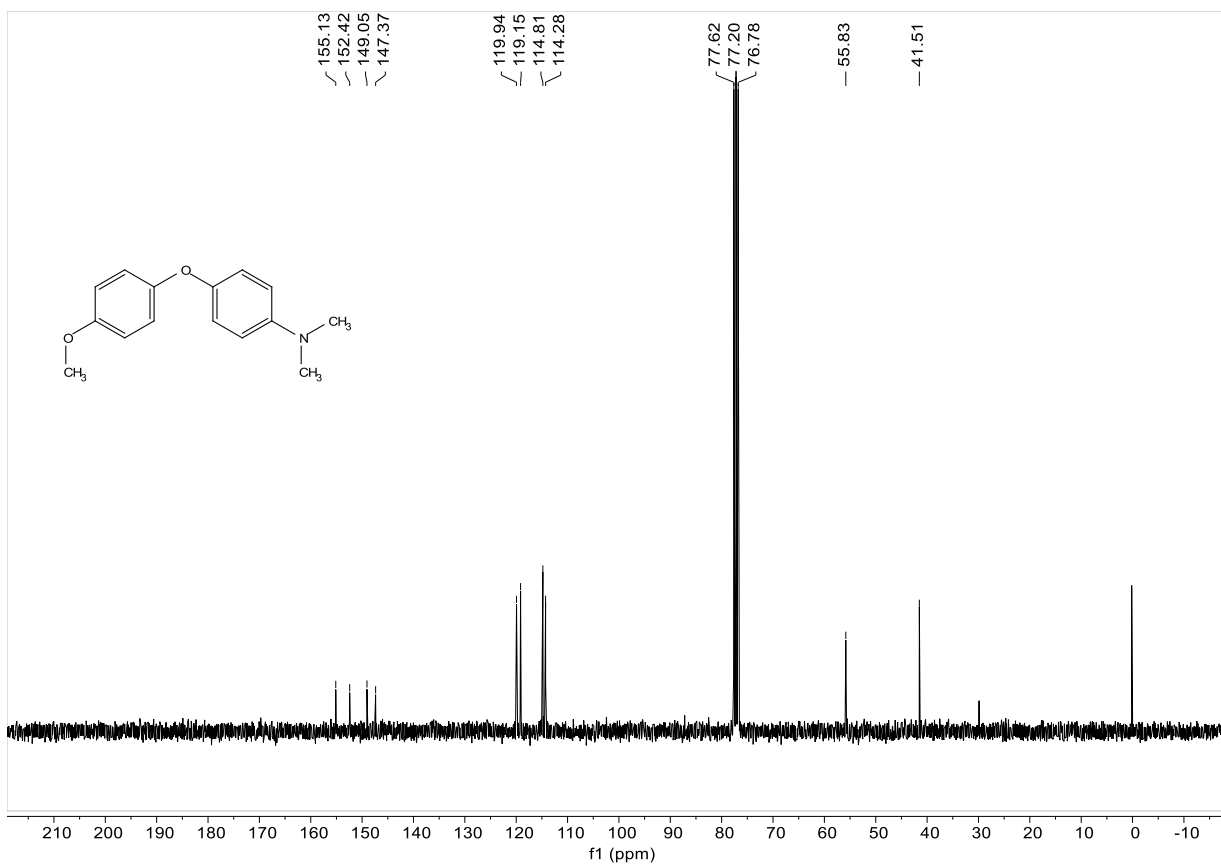

# Compound 3am

## <sup>1</sup>H NMR

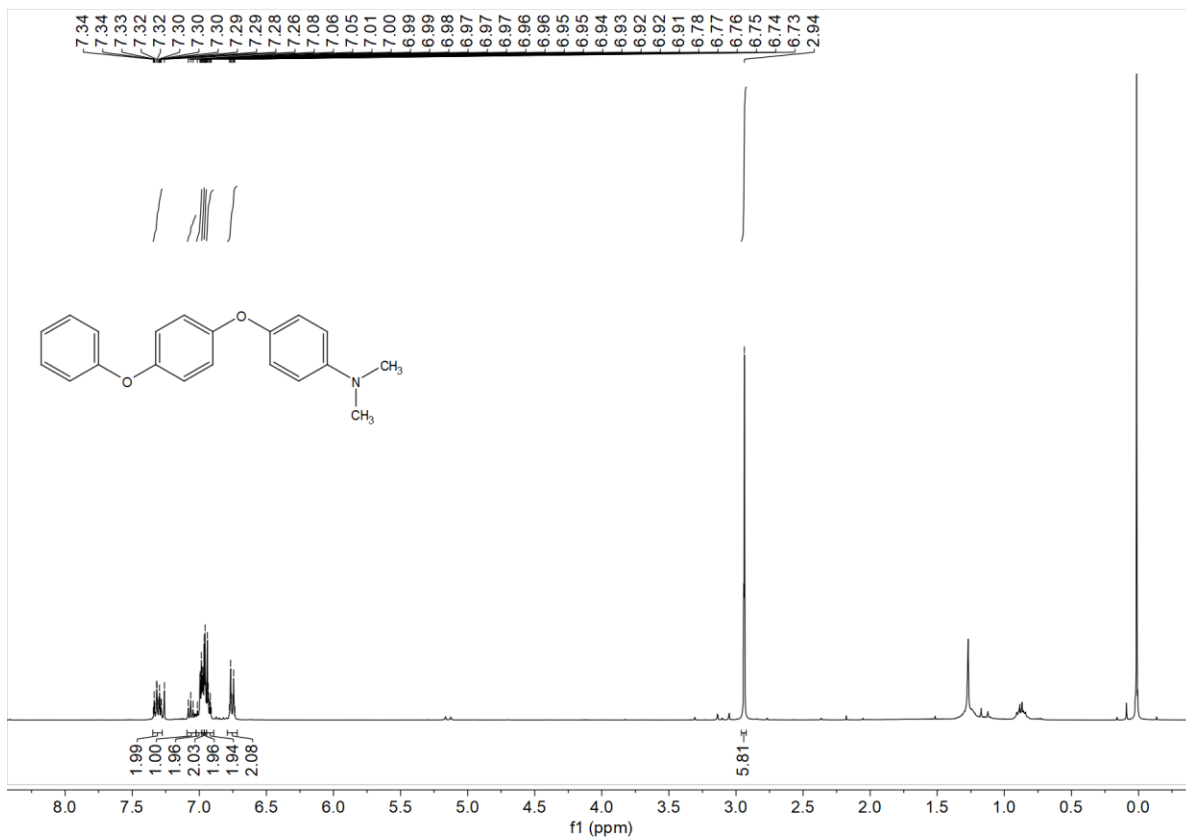

# <sup>13</sup>C NMR

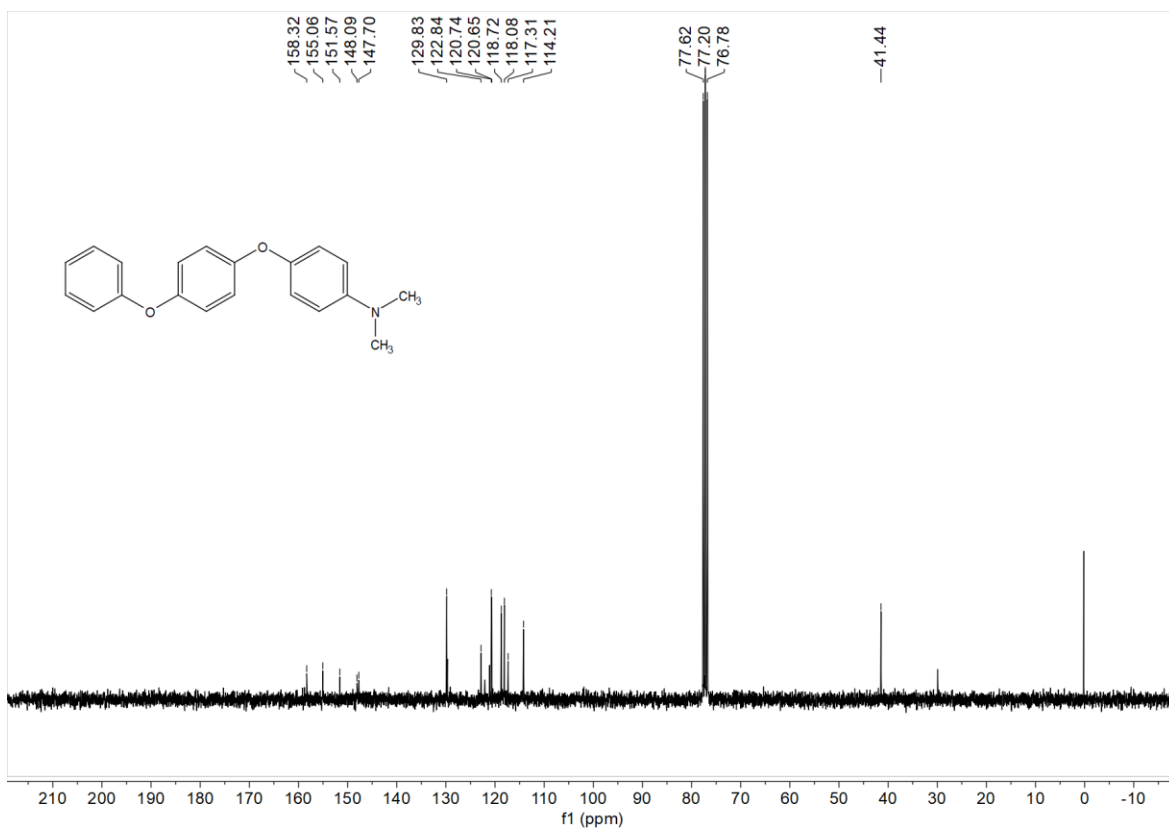



# Compound 3an

## <sup>1</sup>H NMR

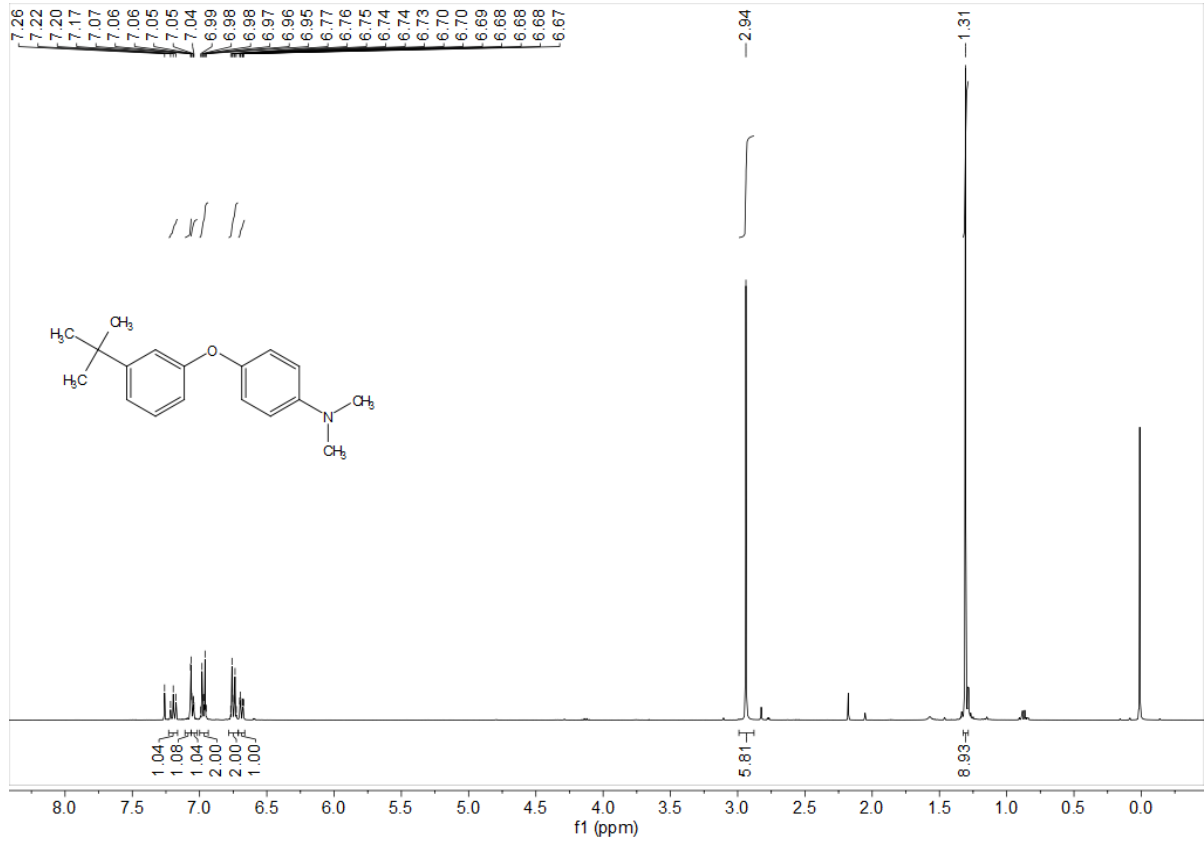

# <sup>13</sup>C NMR

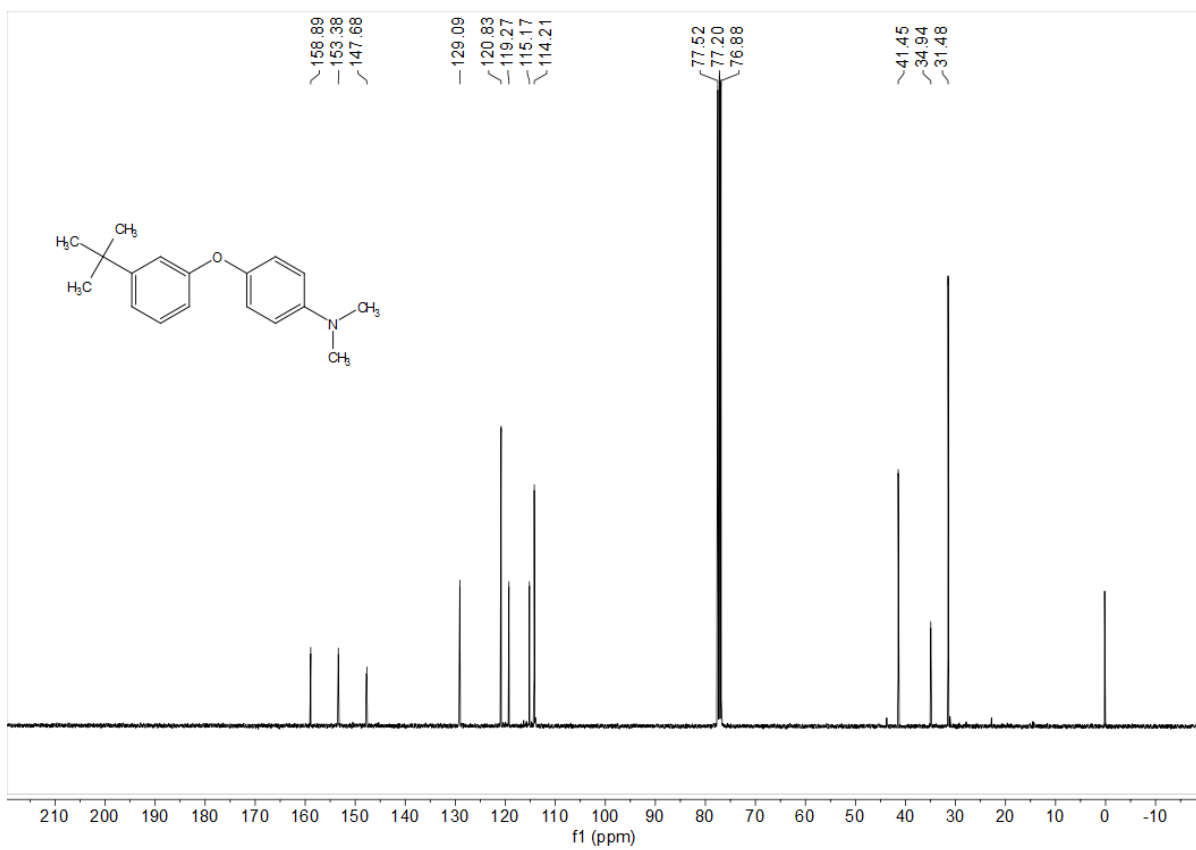

# Compound 3ao

## <sup>1</sup>H NMR

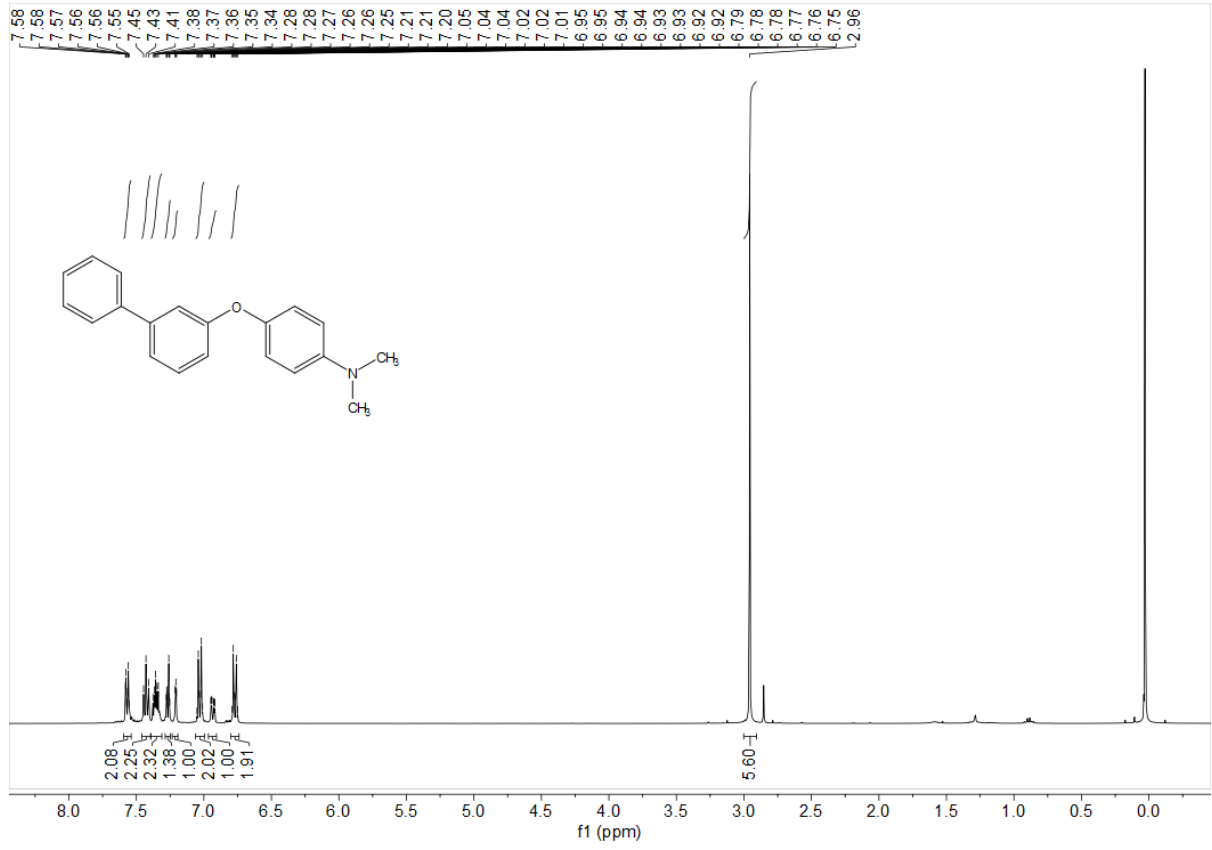

# <sup>13</sup>C NMR

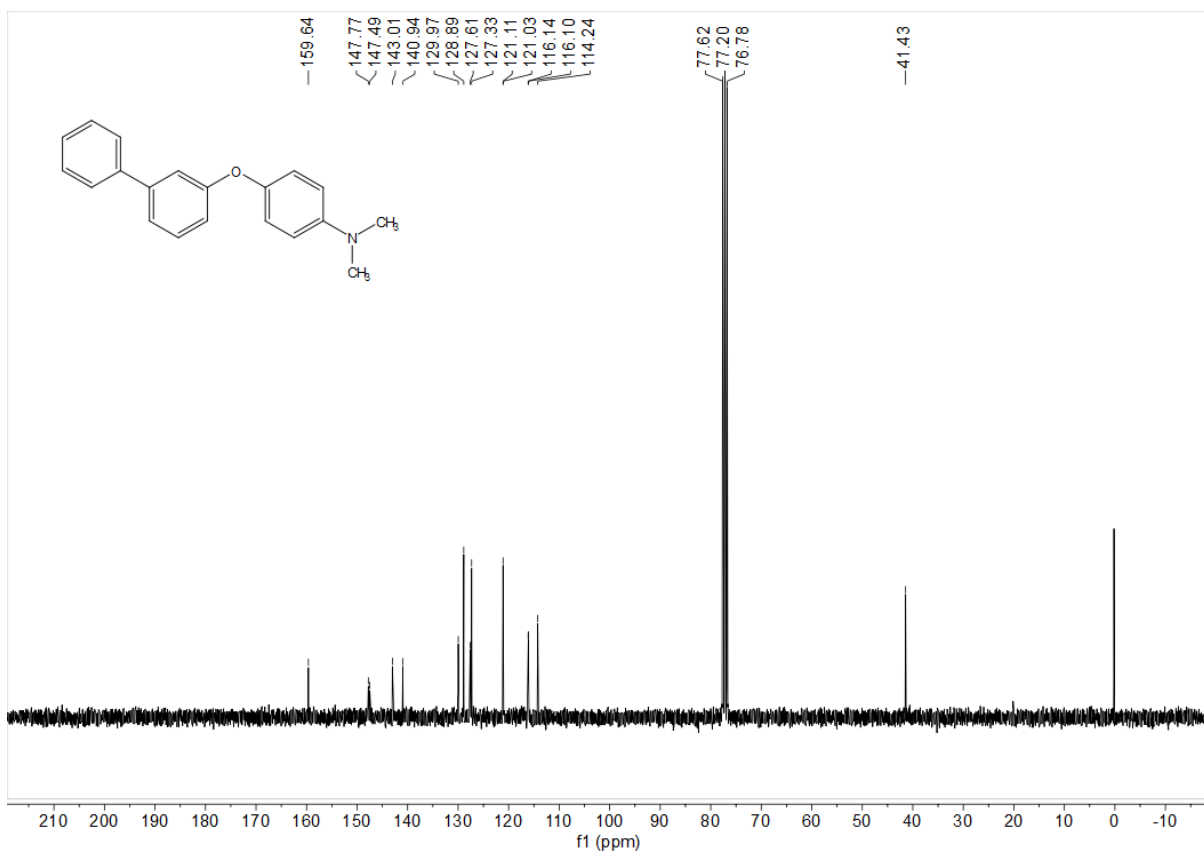

# Compound 3ap

## <sup>1</sup>H NMR

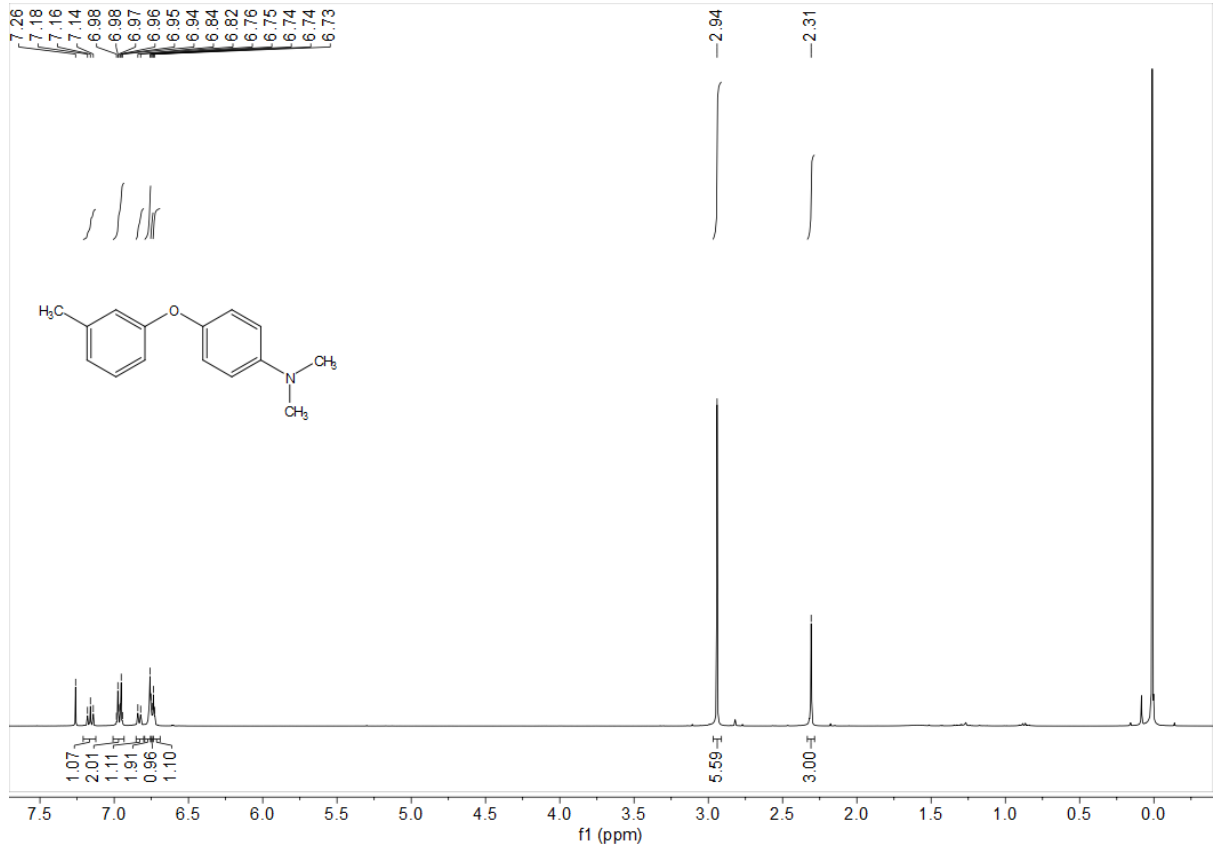

# <sup>13</sup>C NMR

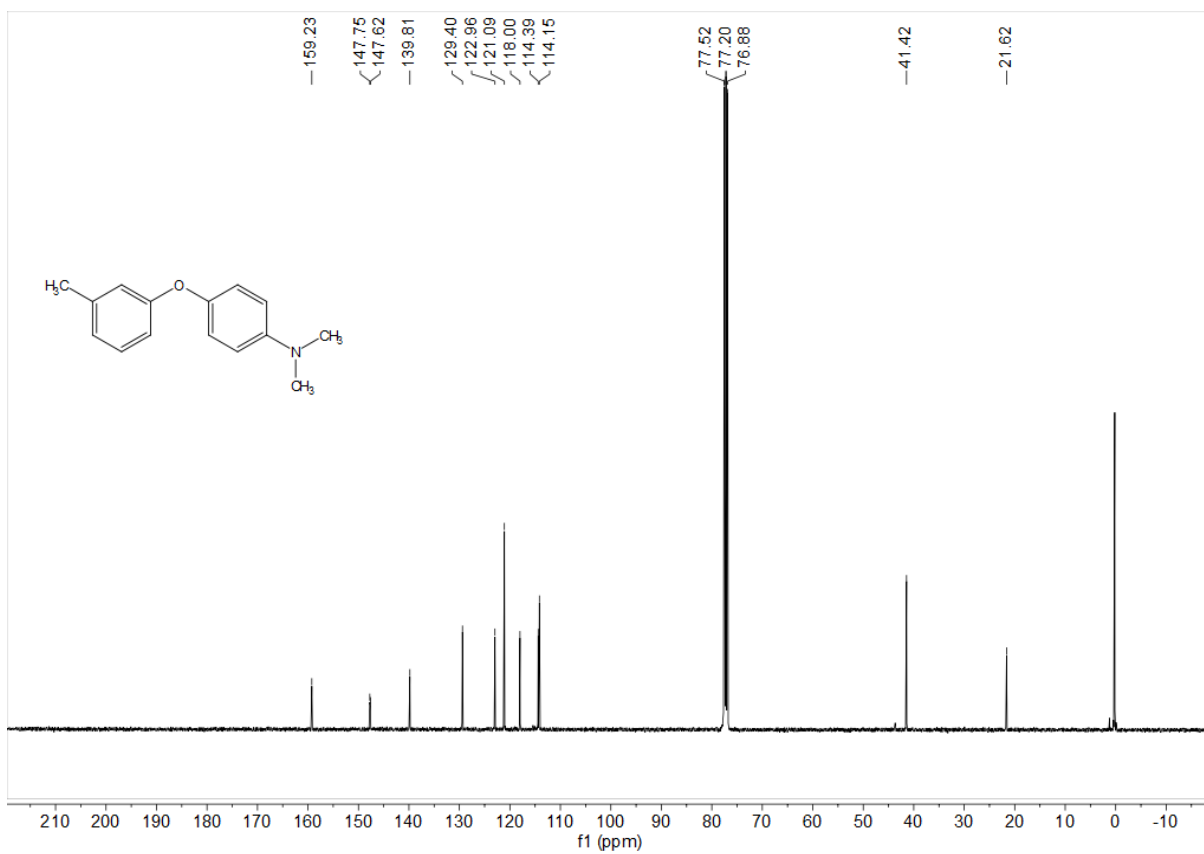

# Compound 3aq

## <sup>1</sup>H NMR

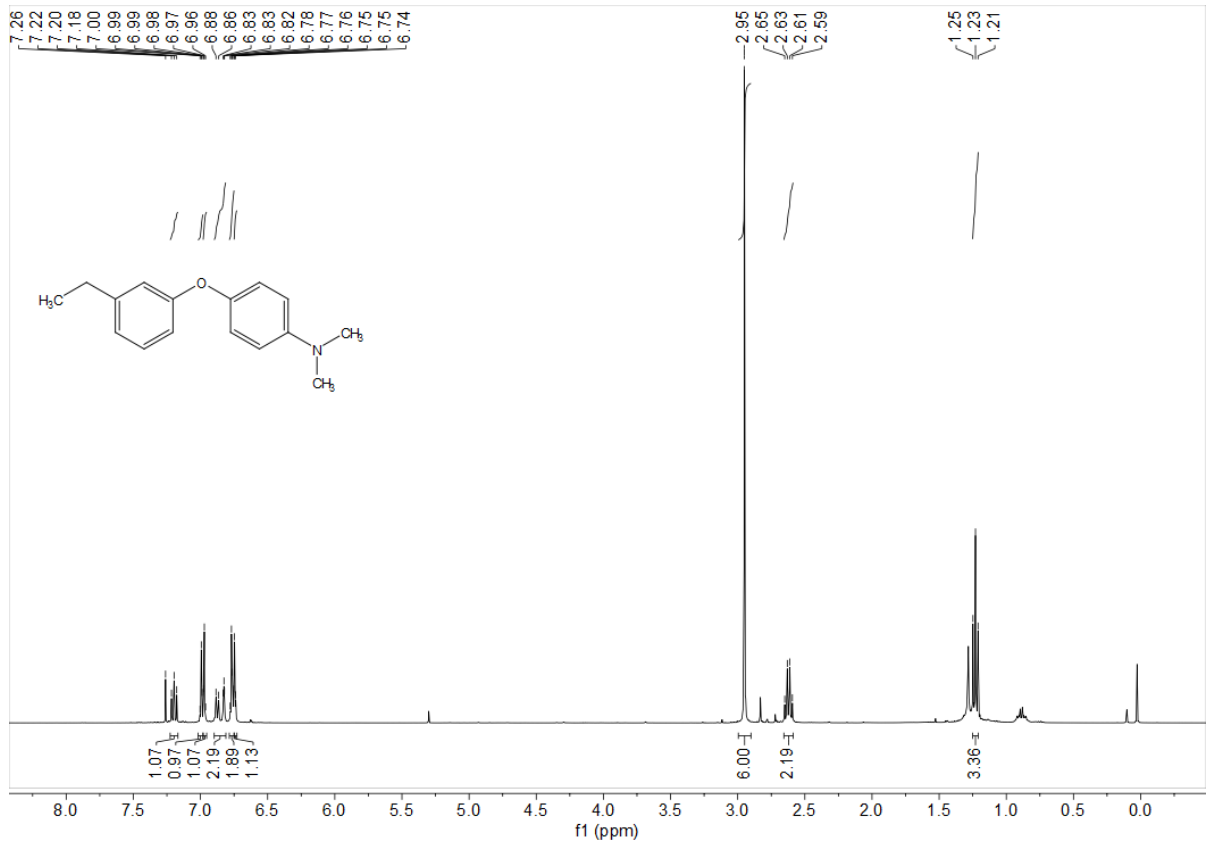

# <sup>13</sup>C NMR

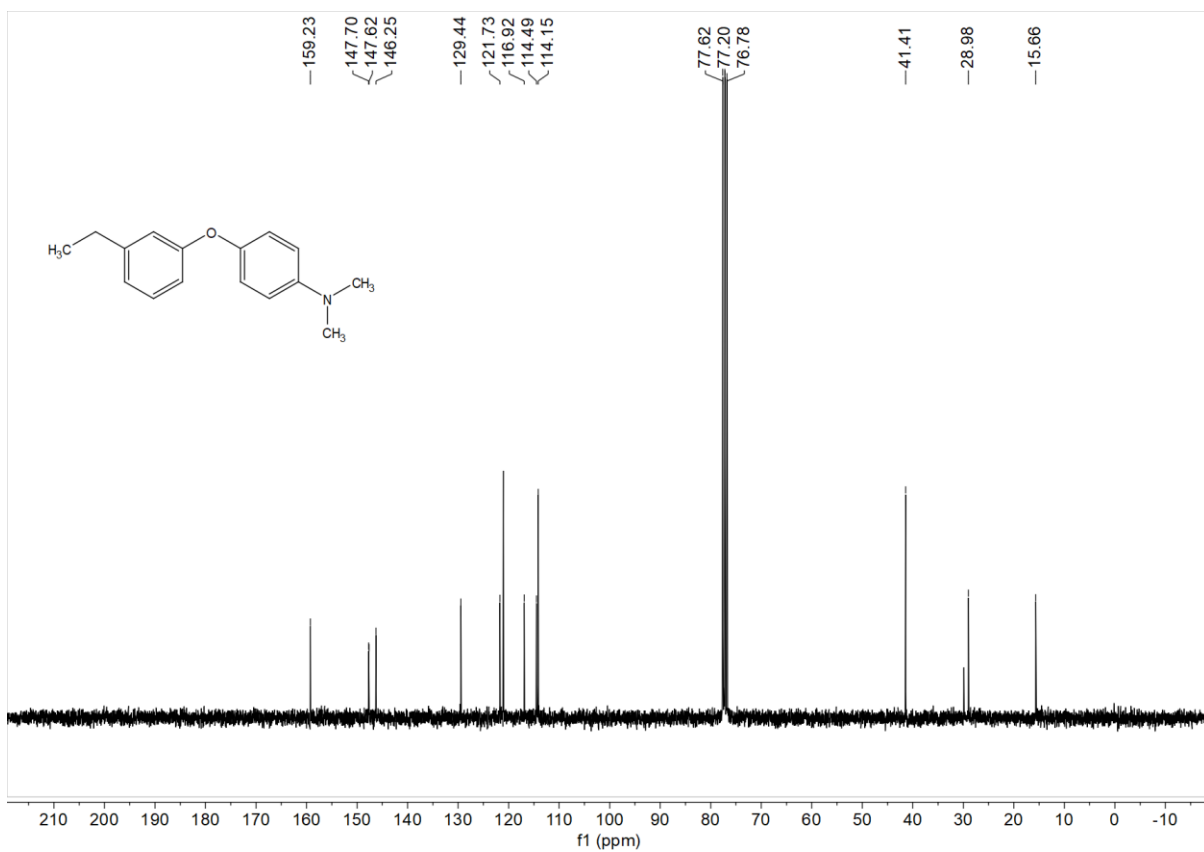



# Compound 3ar

## <sup>1</sup>H NMR

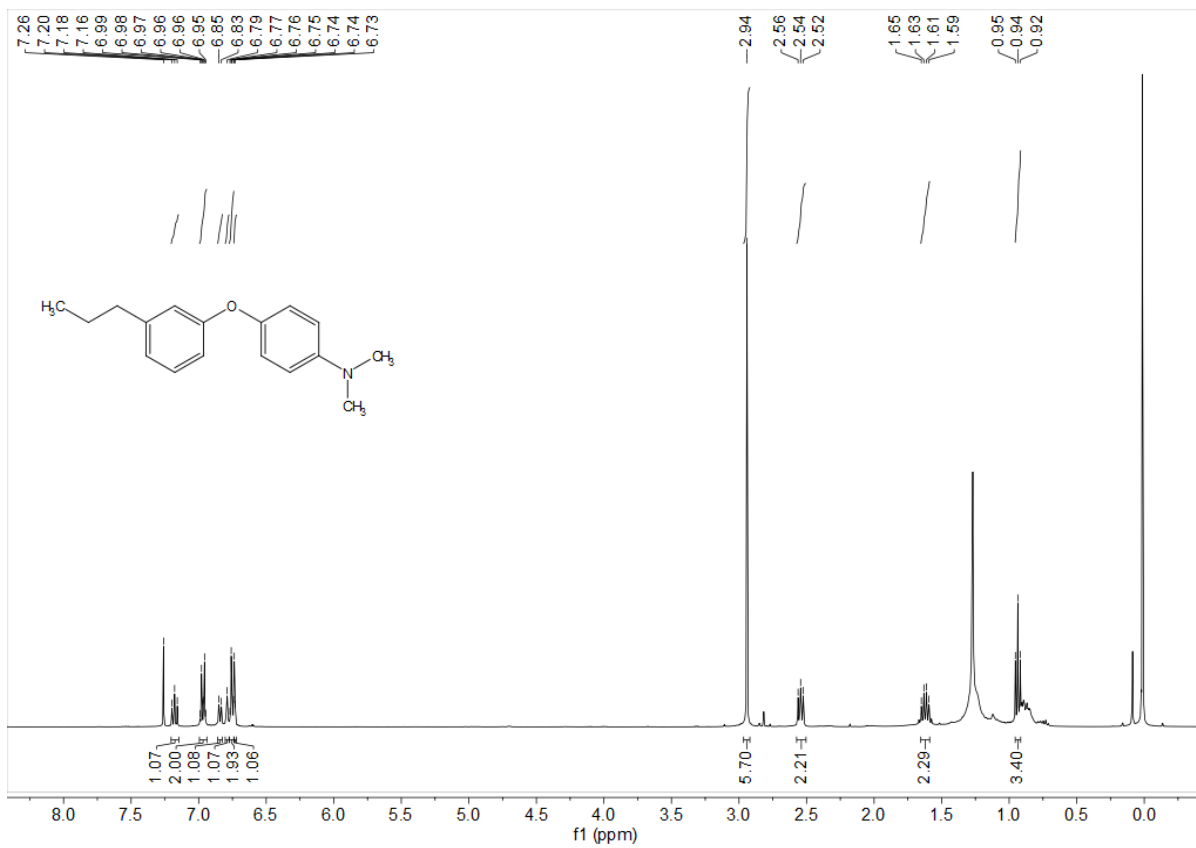

# <sup>13</sup>C NMR

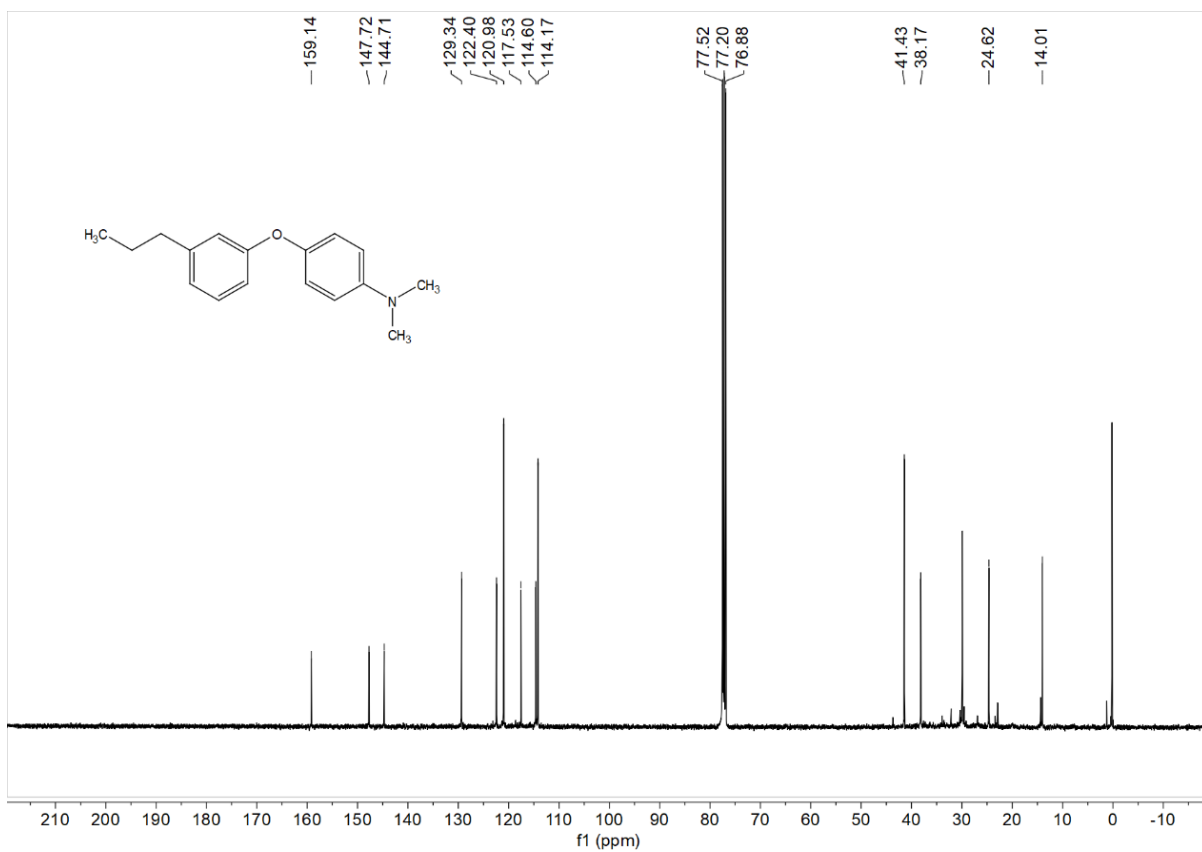

# Compound 3as

## <sup>1</sup>H NMR

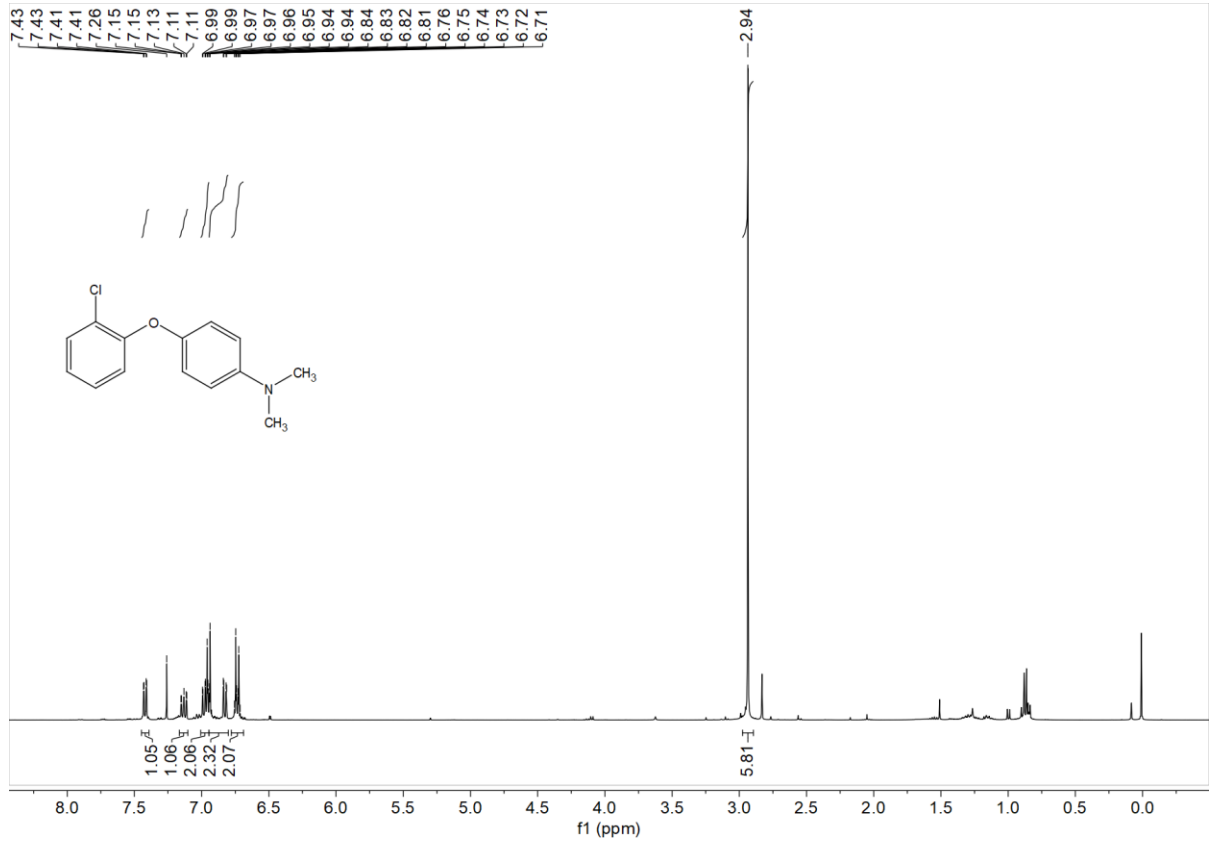

# <sup>13</sup>C NMR

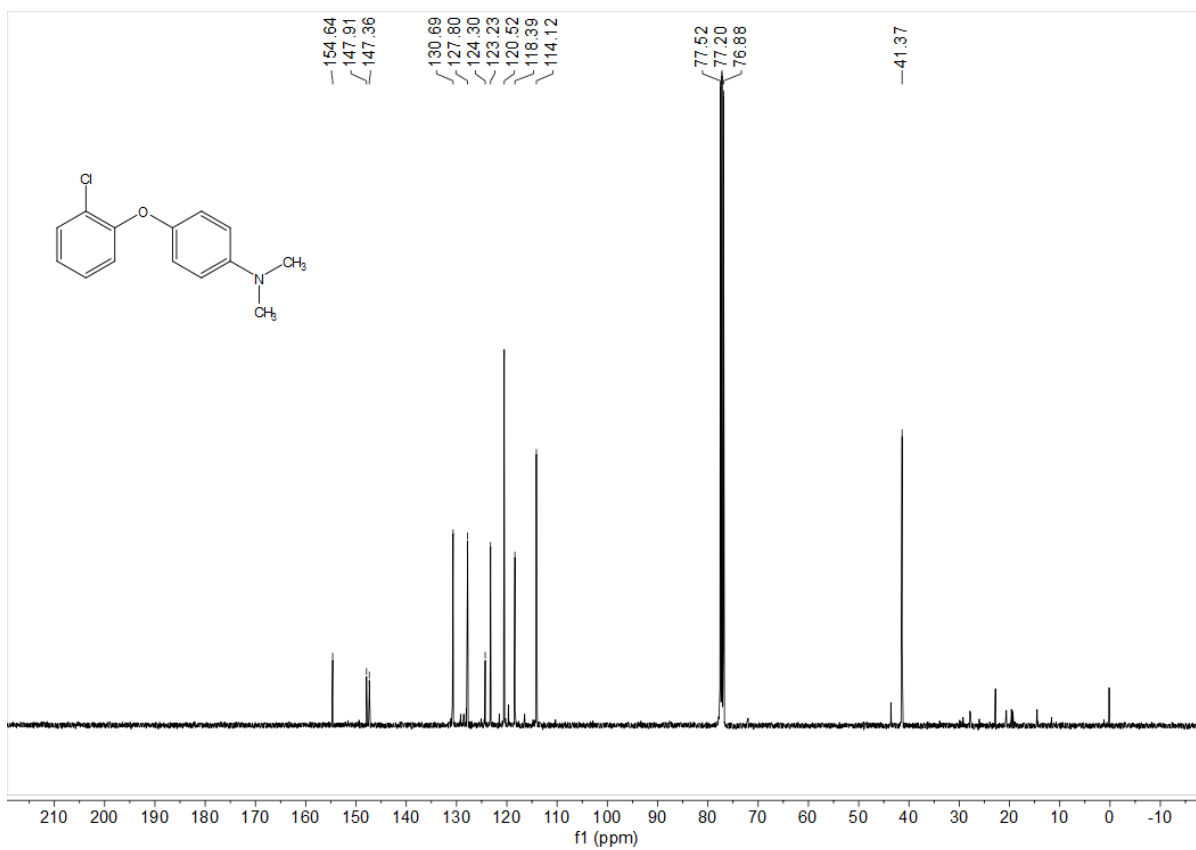

# Compound 3au

## <sup>1</sup>H NMR

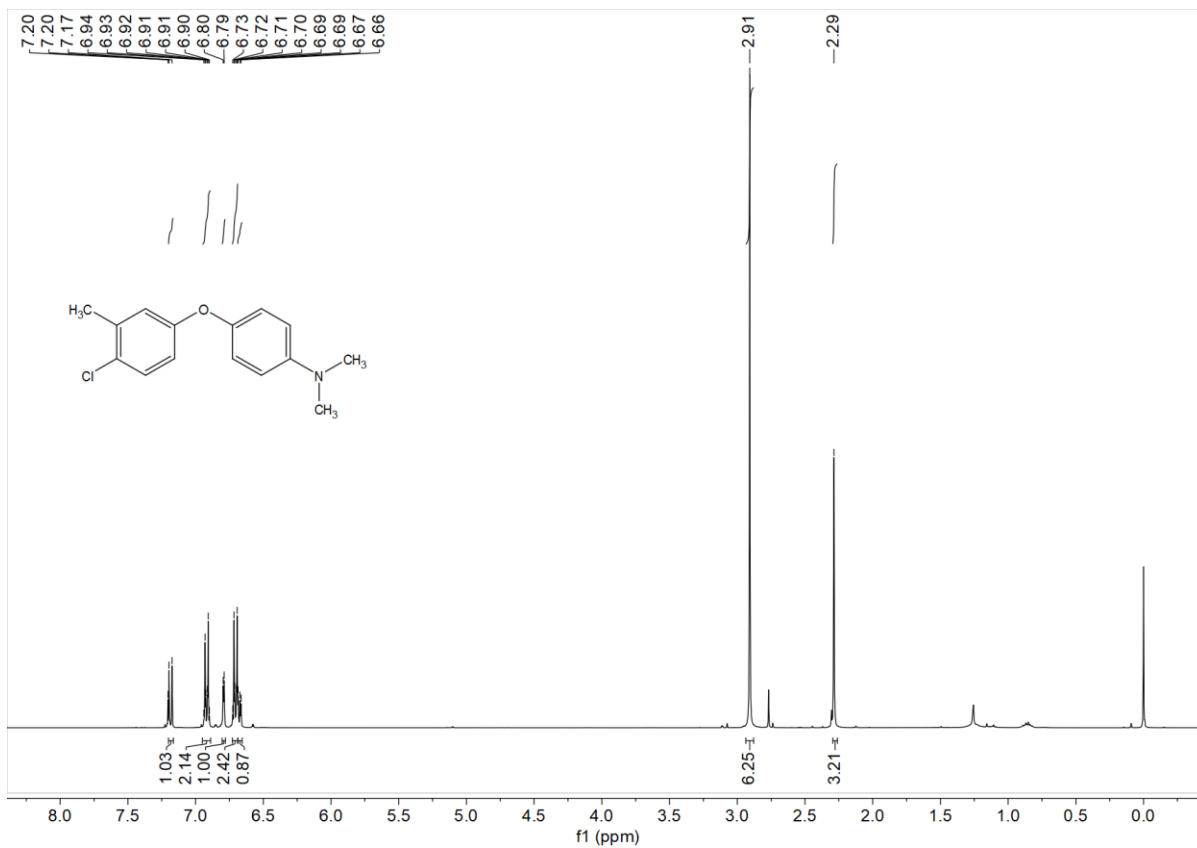

# <sup>13</sup>C NMR

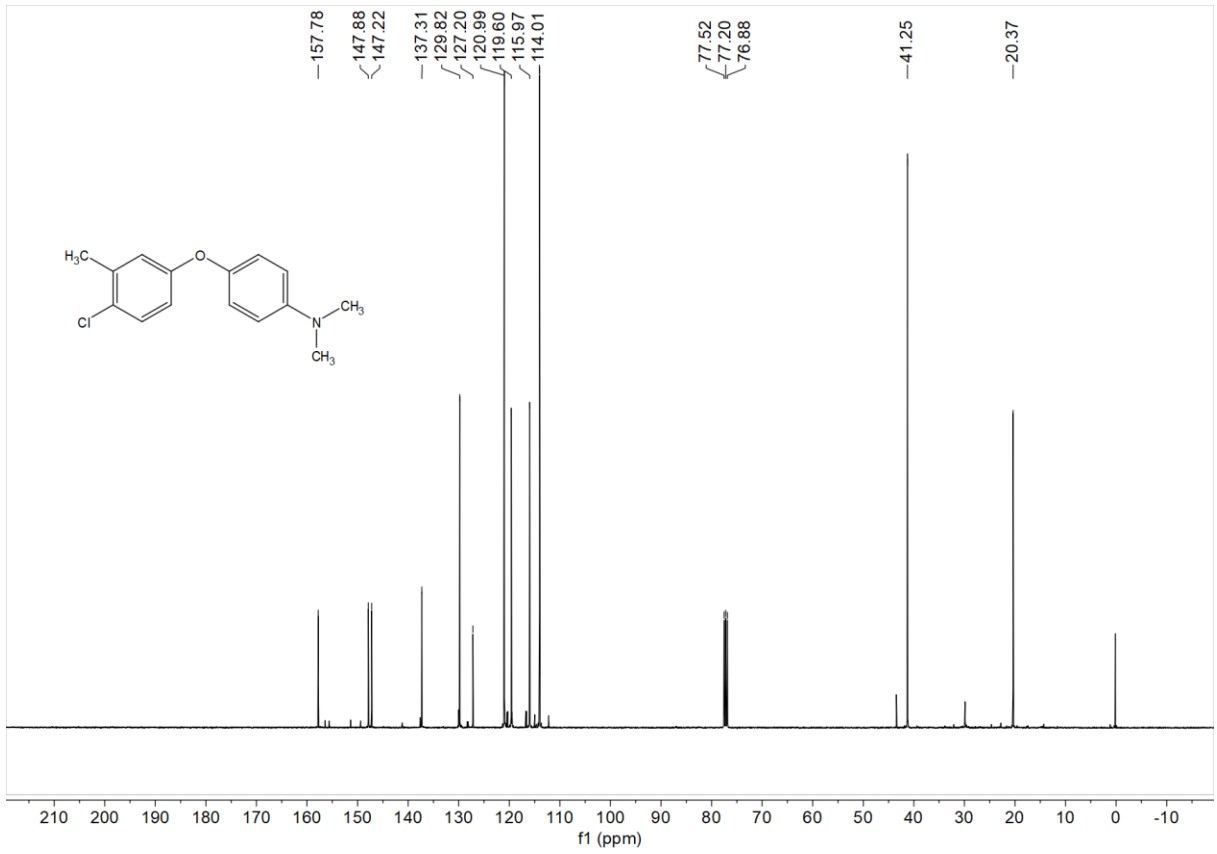

# Compound 3ba

## <sup>1</sup>H NMR

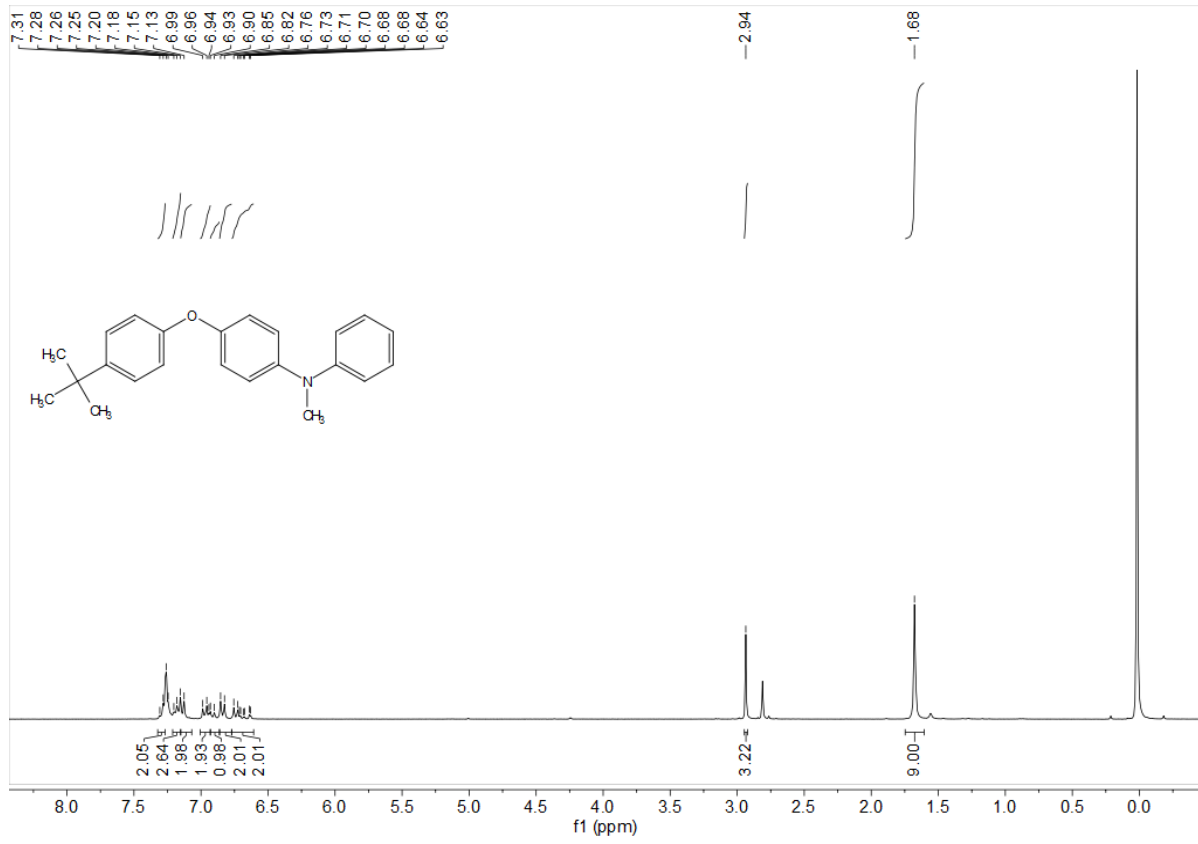

# <sup>13</sup>C NMR

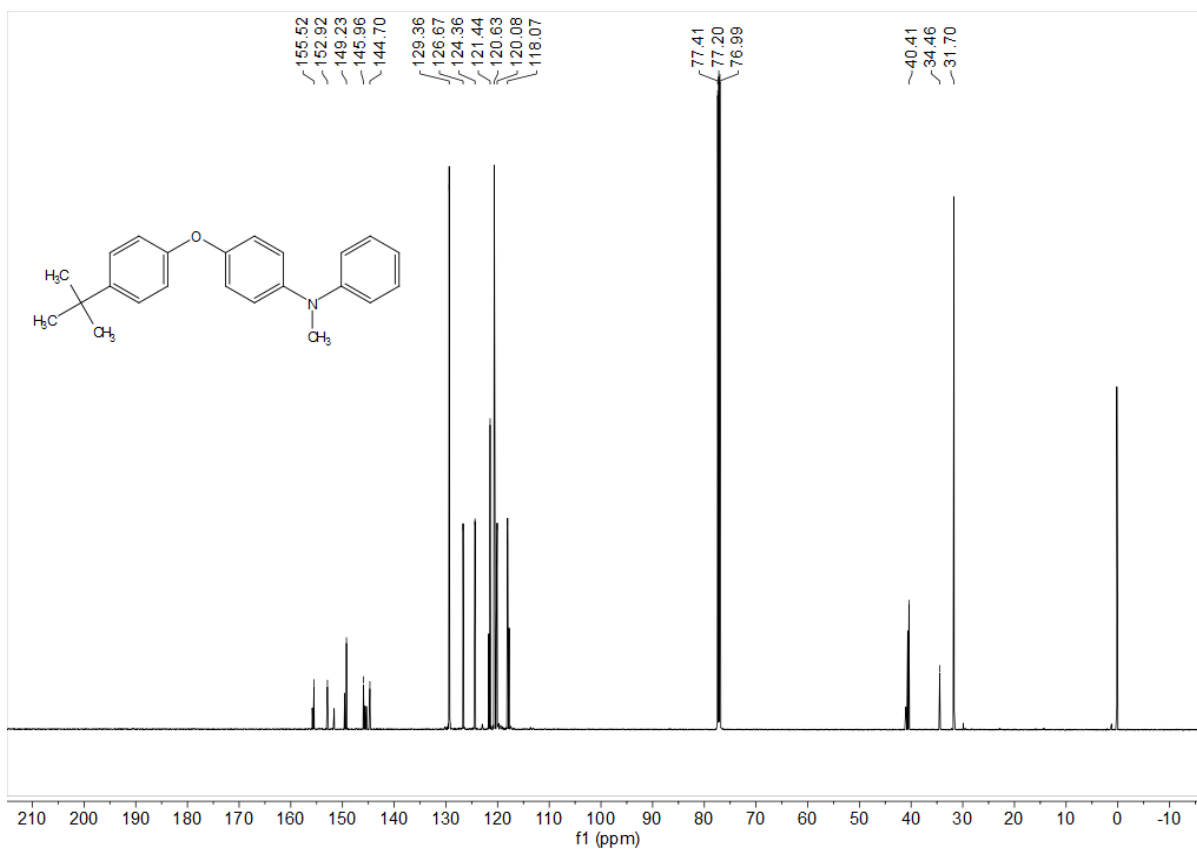



# Compound 3ca

## <sup>1</sup>H NMR

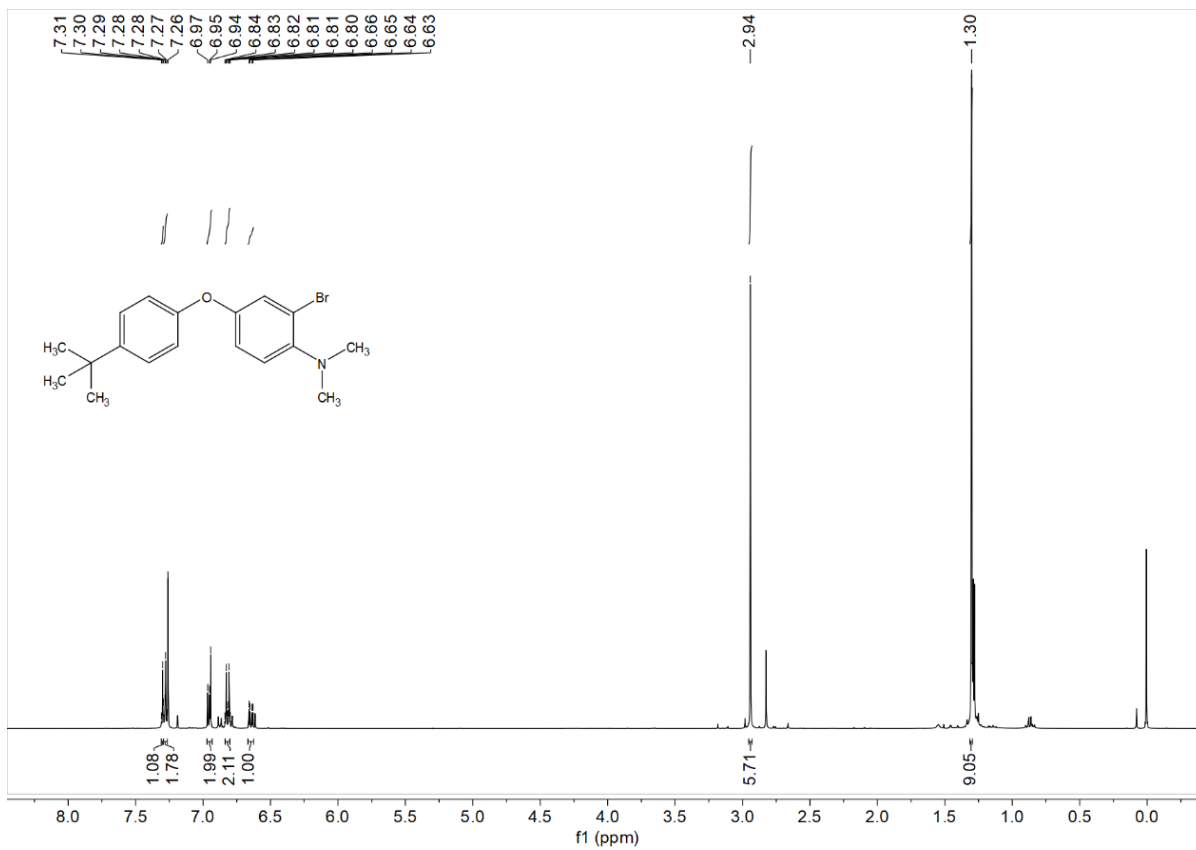

# <sup>13</sup>C NMR

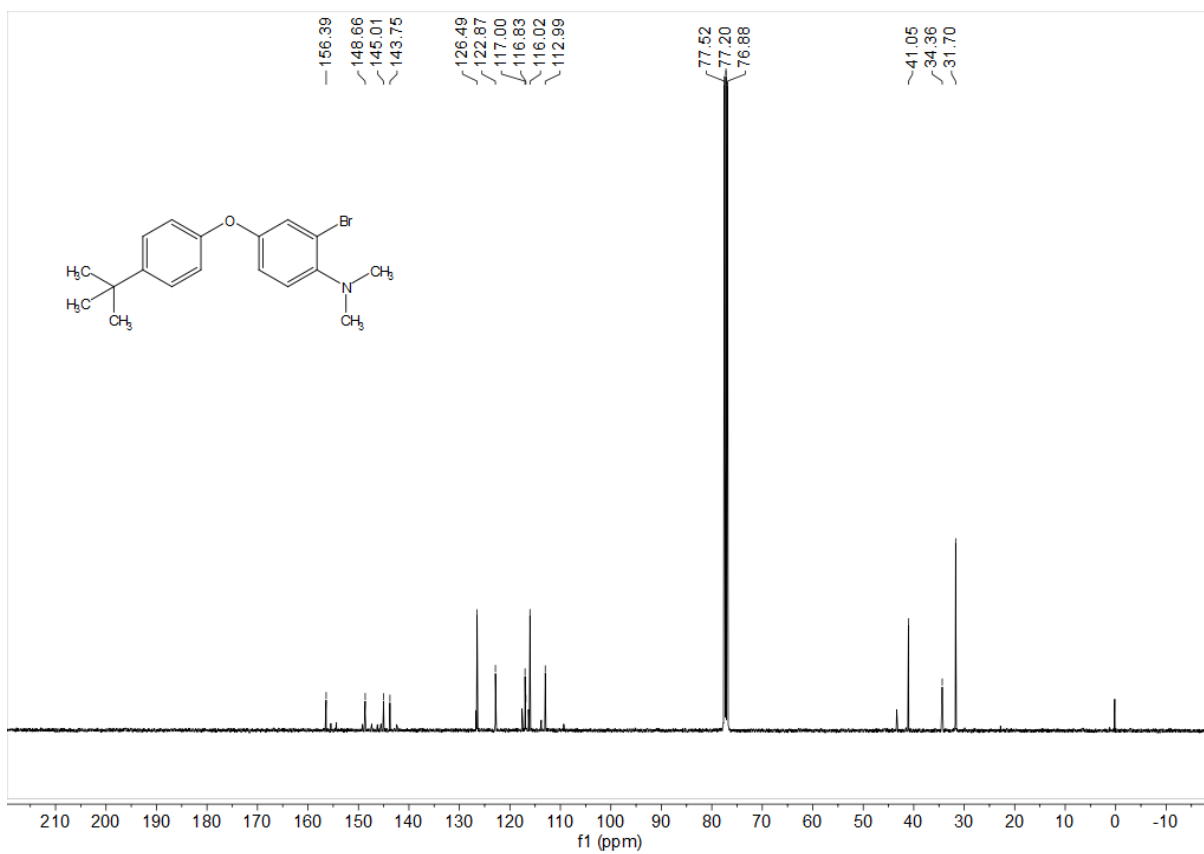

## 7. References

1. S. Stoll, A. Schweiger, EasySpin, a comprehensive software package for spectral simulation and analysis in EPR. *J. Magn. Reson.* **2006**, 178, 42–55.
2. P. Huang, P. Wang, S. Wang, S. Tang, Electrochemical oxidative [4+ 2] annulation of tertiary anilines and alkenes for the synthesis of tetrahydroquinolines. A. Lei, *Green Chem.* **2018**, 20, 4870–4874.
3. Pan. Wang, Z. Yang, T. Wu, C. Xu, Z. Wang, A. Lei, Electrochemical Oxidative C (sp<sup>3</sup>)– H/N– H Cross - Coupling for N - Mannich Bases with Hydrogen Evolution. *ChemSusChem* **2019**, 12,3073 –3077
4. K. Liu, S. Tang, T. Wu, S. Wang, M. Zou, H. Cong, A. Lei, Electrooxidative para-selective C–H/N–H cross-coupling with hydrogen evolution to synthesize triarylamine derivatives. *Nature Commun.* **2019**, 10, 639.
5. M-J. Luo, Y. Li, X-H. Ouyang, J-H. Li, D-L. He, Electrochemical dehydrogenative cross-coupling of two anilines: facile synthesis of unsymmetrical biaryls. *Chem. Commun.* **2020**, 56, 2707–2710.
6. M. Melicharek, R. F. Nelson, The electrochemical oxidation of *N,N*-dimethyl-*p*-toluidine. *J. Electroanal. Chem. Interfacial Electrochem.* **1970**, 26, 201-209.
7. R. J. Mayer, M. Breugst, N. Hampel, A. R. Ofial, H. Mayr, Ambident reactivity of phenolate anions revisited: a quantitative approach to phenolate reactivities. *J. Org. Chem.*, **2019**, 84, 14, 8837–8858.
8. E. N. Wiedemann, Aliphatic and Aromatic Amines: CH Bond Functionalization and Kinetics of Their Reactions with  $\beta$ -lactones,  $\beta$ -lactams, and Carbocationic Electrophiles (Doctoral dissertation, Universitätsbibliothek der Ludwig-Maximilians-Universität).
